# Supplementary material
Source: PubMed Central journal article supplement (PMC6452696)
Supplement: pnas.1814060116.sapp.pdf [file pnas.1814060116.sapp.pdf]

# Supplementary Information for

## **Elevated signature of a gene module co-expressed with CDC20 marks genomic instability in glioma**

Yunqiu Zhang<sup>a</sup>, Jiuyi Li<sup>a</sup>, Kaikai Yi<sup>b,c</sup>, Jing Feng<sup>a</sup>, Zhengmin Cong<sup>a</sup>, Zheng Wang<sup>d,e</sup>, Yanfei Wei<sup>a</sup>, Fan Wu<sup>d,e</sup>, Wen Cheng<sup>f</sup>, Ayaz Ali Samo<sup>a</sup>, Paolo Salomoni<sup>g</sup>, Qiong Yang<sup>a</sup>, Yu Huang<sup>h</sup>, Chunsheng Kang<sup>b,c,i,1</sup>, Tao Jiang<sup>d,e,i,1</sup>, and Xiaolong Fan<sup>a,i,1</sup>

<sup>a</sup>Beijing Key Laboratory of Gene Resource and Molecular Development, Laboratory of Neuroscience and Brain Development, Beijing Normal University, 100875 Beijing, China;

<sup>b</sup>Department of Neurosurgery, Tianjin Medical University General Hospital, 300052 Tianjin, China;

<sup>c</sup>Laboratory of Neuro-Oncology, Tianjin Neurological Institute, Department of Neurosurgery, Tianjin Medical University General Hospital and Key Laboratory of Neurotrauma, Variation, and Regeneration, Ministry of Education and Tianjin Municipal Government, 300052 Tianjin, China;

<sup>d</sup>Department of Neurosurgery, Beijing Tiantan Hospital, Capital Medical University, 100050 Beijing, China;

<sup>e</sup>Beijing Neurosurgical Institute, 100050 Beijing, China;

<sup>f</sup>Department of Neurosurgery, The First Hospital of China Medical University, 110001 Shenyang, China;

<sup>g</sup>German Center for Neurodegenerative Diseases, 53127 Bonn, Germany;

<sup>h</sup>Department of Medical Genetics, School of Basic Medical Sciences, Peking University Health Science Center, 100191 Beijing, China;

<sup>i</sup>Chinese Glioma Genome Atlas Network and Asian Glioma Genome Atlas Network.

### **<sup>1</sup>Correspondence:**

[xfan@bnu.edu.cn](mailto:xfan@bnu.edu.cn) (X.F.); [taojiang1964@163.com](mailto:taojiang1964@163.com) (T.J.); [kang97061@tmu.edu.cn](mailto:kang97061@tmu.edu.cn) (C.K.).

### **This PDF file includes:**

Supplementary information text  
Figs. S1 to S19  
Tables S1 to S11  
References for SI reference citations

## Supplementary Information Text

### Materials and Methods

#### Datasets used in this report

Transcriptome data of gliomas (GSE4290 (1), GSE16011 (2) and the Rembrandt (3)), human brain development (GSE25219 (4)) and cell types (GSE65000 (5)), neural cell types of mouse brain (GSE9566 (6)), human hematopoiesis (GSE24759 (7)), mouse hematopoiesis (GSE77098 (8)) were downloaded from Gene Expression Omnibus (<https://www.ncbi.nlm.nih.gov/geo/>) as of November 2016. Transcriptomes of *C. elegans* were obtained from the study by Kim et al (9). Transcriptome data of different development stages from early embryo to adult *Drosophila* were obtained from the study by Janic et al (10). The data of mRNA-seq, exome-seq, SNP6.0 analysis and the survival data of gliomas were obtained from the TCGA data portal. The data of 381 glioma samples released in 2013 constituted the training cohort, and the more recently released data from 301 grade II-III glioma samples constituted the validation cohort. The CGGA dataset was generated using 319 glioma samples collected at the Department of Neurosurgery, Beijing Tiantan Hospital, Capital Medical University in Beijing from patients treated between 2006 and 2009 (11). Written consent was obtained from all patients.

## **Identification of CDC20-M and CREBRF-M**

Qlucore Omics Explorer 3.2 (Qlucore AB, Lund, Sweden) was used for gene co-expression module construction and differential gene expression between the glioma subtypes. The expression values were log<sub>2</sub>-transformed in all analyses. Using Pearson correlation coefficient (PCC) analysis in the GSE4290 dataset, 185 probe sets (139 genes) with their expression patterns highly correlated to CDC20 (202870\_s\_at) (at PCC not less than 70%) were identified as the CDC20-M. Protein-protein association network of CDC20-M shown in Fig 1A was generated using cytoscape (12). The genes shown in the network were filtered with a combined score > 0.99. The combined score was computed by combining the probabilities from the different evidence channels and corrected for the probability of randomly observing an interaction (13).

CREBRF expression was found to be consistently anti-correlated to CDC20 in all glioma datasets. CREBRF-M was constructed in GSE4290 including 157 probe sets (120 genes) at a PCC to CREBRF (235556\_at) not less than 70%.

## **Stable and robust clustering of gliomas into subgroups with high or low expression of CDC20-M or CIN70**

Using mRNA-seq data from the TCGA training cohort, we performed unsupervised consensus clustering based on partitioning around medoid (PAM) (14) to define stable and robust clusters, which was implemented in R package ConsensusClusterPlus. The expression values of the CDC20-M and CREBRF-M members were first log<sub>2</sub> transformed and z-score standardized. Euclidean distance was also integrated into the clustering

analysis. The PAM clusters were iterated for 1000 times by random selection of 90% samples in each round. The resulting clusters for a given number of K were summarized in a consensus matrix. The K tested ranged from 2-10. The reasonable K was determined by the “cleanest” consensus matrix plot, and the best bimodal shape of CDF curve (close to 0 or 1). Unsupervised consensus clustering was also performed with CIN70 at K = 2.

### **Single sample prediction (SSP) of samples into the subtypes with distinct CDC20-M and CREBRF-M expression or with CIN70 expression**

The mean expression profiles (the centroids) for CDC20-M and CREBRF-M members were calculated for the four subgroups of the TCGA training cohort shown in Fig. 2B. Samples in the TCGA validation cohort and the CGGA data set were then assigned to the nearest subtype/centroid using Spearman correlation. Chromosomal abnormalities, mutation burdens and survival analysis were subsequently performed in the individually assigned samples. SSP was also performed for the TCGA validation and CGGA datasets according to CIN70 signature-based clustering as shown in Fig. S8.

### **Survival analysis**

Overall survival time was calculated from the date of surgery until death or the last follow-up contact. Kaplan-Meier survival curves were generated and analyzed with log-rank test using Prism 5.0 software.

### **Cox regression analysis**

Cox regression analysis was performed with SPSS software, with survival time as the

dependent variable. CDC20-M score for each glioma sample was calculated as the average of normalized expression levels for CDC20-M members, and used as variables in multivariate Cox regression analysis.

### **Analysis of somatic copy number alterations and mutations**

The level III SNP6.0 data of gliomas was downloaded from TCGA. The normalized data from cancer samples and their somatic controls were grouped according to the CDC20-M classification, and processed using NEXUS COPY NUMBER™ 8.0 (Biodiscovery Inc.). The implemented call algorithm was SNP-FASST2 (Fast Adaptive States Segmentation Technique) segmentation. It first calculated the log<sub>2</sub> ratio of each probe across the whole genome and then arranged the ratios according to the probe position along the chromosome for each sample. The FASST2 algorithm was used to segment the genomes into regions of uniform ratios. Finally, the copy numbers of each region were inferred according to their log<sub>2</sub> ratios. The log<sub>2</sub> ratio threshold for gain, loss, high level gain and homozygous loss were 0.25, -0.2, 0.7 and -1.1, respectively. The gain and loss refer to single copy gain and single copy loss, respectively. High level gain indicates gain of two or more copies.

GISTIC2.0 (15) was used to analyze the arm-level and focal SCNAs of glioma samples. We used a noise threshold of 0.3, a broad length cutoff of 0.5 chromosome arms, a confidence level of 95% and a copy-ratio cap of 1.5. Copy number alterations of CDC20-M members were also analyzed by GISTIC2.0 under the same amplitude threshold as above. Similarly, we also analyzed the SCNAs and mutations in the core members of the TP53 pathway.

Mutation data were also downloaded from TCGA, the workflow for mutation detection

was MuTect2 (16). We analyzed the frequencies of Indels/frameshift mutations, synonymous mutations and non-synonymous mutations according to the annotation downloaded from TCGA portal.

Outlier samples with extreme data of SCNAs or mutations were excluded using a boxplot method (17, 18).

### **Gene set enrichment analysis (GSEA)**

The enrichment of gene sets involved in DNA damage response across CDC20-M/CREBRF-M classified glioma subtypes was analyzed using GSEA (<http://software.broadinstitute.org/gsea/index.jsp>), which is a computational method determining whether an a priori defined set of genes shows statistically significant, concordant differences between two biological states (19). Gene sets were downloaded from <http://software.broadinstitute.org/gsea/msigdb/genesets.jsp?collection=BP#>. All parameters were set as default.

### **Gene dosage-dependent analysis**

The gene dosage-dependent expression of the core members of CDC20-M (CDC20, AURKA, KIF2C, CENPF, CCNB1 and CCNB2) was analyzed among the gliomas with high or intermediate CDC20-M expression in the TCGA training cohort. Spearman's rank correlation analysis between the data of gene expression and gene dosage was performed.

### **Cell culture conditions**

All cells were maintained at 37°C in a humidified 5% CO<sub>2</sub> atmosphere. The patient

information of each cell line is listed in Table S9. The neuroblastoma cell line SK-N-SH (SK) was obtained from the National Infrastructure of Cell Line Resource (#3111C0001CCC000086). N5, N9, N33, PDX and SK cells were cultured in DMEM/F12 (Life Technologies, #11330-032) supplemented with 1% Penicillin-Streptomycin (Life Technologies, #15140122) and 10% FBS (Gemini, #900-108). N3 and N8 cells were cultured in DMEM/F12 (Life Technologies, #11330-032) supplemented with 1% Penicillin-Streptomycin (Life Technologies, #15140122), 1% B-27 (Life Technologies, #17504044) and 10% FBS (Gemini, #900-108). Human astrocytes (HA) (ScienCell, #1800) were cultured according to the manufacturer's protocol in astrocyte medium (ScienCell, #1801) containing 5% FBS, astrocyte growth supplement and 1% penicillin/streptomycin.

### **Real-time quantitative PCR**

Total RNA was isolated using the RNeasy Plus Mini Kit (QIAGEN, #74134). Reverse transcription was performed with High Capacity RNA-to-cDNA Kit (Applied Biosystems, #4387406). TaqMan™ Universal Master Mix II, with UNG (Applied Biosystems, #4440038) was used for amplification using the Applied Biosystems 7500/7500 Fast Real-Time PCR Systems (Applied Biosystems). All samples were run in triplicate in parallel with UBC as the control. Using the  $\Delta\Delta C_T$  method, relative transcript copy number for each transcript was normalized to UBC. The Taqman primer sets used for each transcript were: human CDC20 (CDC20 TaqMan® Gene Expression Assays, #Hs00426680\_mH), human AURKA (AURKA TaqMan® Gene Expression Assays, #Hs01582072\_m1), human KIF2C (KIF2C TaqMan® Gene Expression Assays, #Hs00901710\_m1), and human UBC (UBC TaqMan® Gene Expression Assays, #Hs01871556\_s1).

### **Identification of FGFR3-TACC3 fusion transcript**

pLOC-FGFR3-TACC3 plasmid (a kind gift from Dr. Antonio Iavarone) was used as the positive control for detection of FGFR3-TACC3 fusion. cDNAs of HA, N5, N9, N33, PDX, N3, N8 and SK were generated as described above. Primer pair used for the FGFR3-TACC3 fusion screening was: FGFR3ex13-FW: 5' - GGCATGGAGTACTTGGCCTC - 3' and TACC3ex9-RV: 5' - GACGTCCTGAGGGAGTCTCA - 3', amplification conditions were 95°C-30 seconds/60°C-30 seconds/68°C-1 minute for 35 cycles, 68°C-5 minutes.

### **Cell survival and proliferation assay**

2000 cells per well were plated in 96-well plates in a total volume of 100 µl medium described above. Each concentration of drug treatment was tested in six replicates. Fresh medium with or without drug was added every third day. Cell growth was measured using alamarBlue according to manufacturer's instruction (Thermo Fisher Scientific, #DAL1025). Briefly, cells were incubated with alamarBlue reagent (10 µl/100 µl medium) for 4 h at 37°C. Cell growth was then measured using a fluorescence plate reader with an excitation wavelength of 530 nm and an emission wavelength of 580 nm. The relative numbers of viable cells were expressed as the percentage of untreated cells.

### **Karyotype analysis**

When the cultures in T75 flasks reached a confluence of 80%, Colcemid<sup>®</sup> (10 mg/mL) was added to a final concentration of 0.1 mg/mL. Following an incubation at 37°C for 4 h, changes in cell morphology were monitored using an inverted microscope. The cells were



detached using 1 mL of TrypLE™ Express (Life Technologies, #12605-010) for 5 min at room temperature. Then the cells were pelleted at  $300 \times g$  for 5 min. For the hypotonic treatment, 10 mL of pre-warmed 0.075 M KCl was slowly and carefully added, followed by an incubation at 37°C for 15 min and fixation using methanol:acetic acid (3:1) solution. Prior to slide preparation, clean slides were placed in steam while the cells were resuspended in fresh fixative solution and dropped onto the surface of the slide. In order to obtain G-bands, the slides were aged at 70°C for 3 h, and subsequently immersed in trypsin solution (0.2%, PH = 7.2) for 6 s, washed in saline solution and finally quickly rinsed in distilled water. The staining procedure was carried out using Giemsa (1:20), producing trypsin and Giemsa (GTG) bands. The band quality was evaluated under the microscope at a magnification of 100x and the lengths of trypsin treatment and Giemsa staining were adjusted in order to produce well stained bands.

### **Immunofluorescence staining**

$10^5$  cells per well were plated on coverslips in a 6-well plate for 24 h. The cells were fixed with 4% paraformaldehyde for 15 min, washed  $2 \times 5$  min with phosphate-buffered saline (PBS). Cells were permeabilized with 0.1% Triton X-100 for 5 min, washed  $2 \times 5$  min with PBS and blocked with 5% fetal bovine serum (FBS) for 1 h. Cells were then incubated with one of the following primary antibodies at 4°C overnight: mouse anti- $\alpha$ -tubulin (Sigma, #T5168, clone ID: B-5-1-2, at 1:2000 dilution in 5% FBS), rabbit anti- $\gamma$ -tubulin (Sigma, #T3320, at 1:1000 dilution), rabbit anti-CENPB (abcam, #ab25734, at 1:100 dilution), or mouse anti-p-H2A.X (Thermo Fisher Scientific, #14-9865-82, clone ID: CR55T33, at 1:100 dilution). Following  $3 \times 5$  min washing with 5% FBS, the coverslips were incubated

with two of the following secondary antibodies: Alexa Fluor anti-mouse 647 (for  $\alpha$ -tubulin primary antibody), Alexa Fluor anti-rabbit 488 (for  $\gamma$ -tubulin or CENPB primary antibody), Alexa Fluor anti-mouse 488 (for  $\alpha$ -tubulin or p-H2A.X primary antibody) or Alexa Fluor anti-rabbit 568 (for  $\gamma$ -tubulin or CENPB primary antibody) (all from Life Technologies, at 1:100 dilution) for 1 h. Finally, coverslips were washed  $3 \times 5$  min with 5% PBS, and mounted with Antifade Mounting Medium with DAPI (Vector laboratories, #H-1200) according to the manufacturer's protocol.

The coverslips were examined under a Zeiss LSM700 confocal microscope. The images in Fig. 4C a and g panels are projection images of confocal image stacks of 1  $\mu$ m interval.

### **Hematoxylin and eosin (HE) staining and immunohistochemical staining**

Glioma specimens were fixed in 4% paraformaldehyde for 24 h and stored in 70% ethanol until paraffin embedding. Embedded tissue was processed to 5  $\mu$ m sections and stained with hematoxylin and eosin (HE).

Immunohistochemical staining for the relevant proteins was performed on deparaffinized sections, rehydrated and treated in 10 mM citrate buffer (100 °C, 10 min) for antigen repair. Subsequently, the sections were immersed in ethanol containing 3% hydrogen peroxide for 10 min to block endogenous peroxidase activity. The sections were incubated overnight at 4 °C with one of the following primary antibodies: rabbit anti-p-AURKA (Thermo Fisher Scientific, #44-1210G, at 1:100 dilution), mouse anti-p-H2A.X (Thermo Fisher Scientific, #14-9865-82, clone ID: CR55T33, at 5  $\mu$ g/ml), and rabbit anti-CDC20 (Sigma, #HPA055288, at 1:50 dilution), followed by  $3 \times 5$  min washing in PBS and incubation with the secondary anti-rabbit or anti-mouse antibodies conjugated with peroxidase. The images

were captured with Axio Imager 2 (Zeiss) after 3,3'-diaminobenzidine staining.

### **Grading of Ki-67 staining intensity**

The Ki67 staining results were obtained from the Department of Pathology at Beijing Tiantan Hospital, Capital Medical University, with rabbit anti-Ki-67 mAb (ZSGB Bio, Cat# ZA-0502) as the primary antibody. The staining was assessed by observing 10 randomly selected fields, 100 cells were observed in each field. Samples containing <5%, 5%-30%, 30%-50% and >50% Ki67-positive cells were considered as intensity grades 0, 1, 2 and 3, respectively.

### **Analysis of cell cycle and MLN8237 treatment-induced cell polyploidization**

The cell fraction in the S phase and quantification of MLN8237-induced polyploidization (with > 4N DNA content) were assessed in all glioma cell lines used and also in the HA cells. For detection of the cell fraction in the S phase, Click-iT™ EdU Alexa Fluor™ 488 Flow Cytometry Assay Kit (Invitrogen, #C10420) was employed. Briefly, following treatment with MLN8237 or DMSO for 72 h, cells were incubated with EdU at a concentration of 10 μM for 40 minutes. Cells were then dissociated, detection of EdU was subsequently performed according to the manufacturer's instructions. DNA was stained with Hoechst 33342 dye (Life Technologies, #H3570). Quantification of polyploidization of cells following MLN8237 treatment was also performed in living cells without EdU treatment. The stained cells were assessed by flow cytometry (ACEA NovoCyte™) using the Pacific-blue channel to detect DNA content and analyzed using Flowjo 10.

## **Orthotopic patient derived xenograft glioma model and treatment with AURKA inhibitor MLN8237**

5-week-old female BALB/C nude mice (Chinese Academy of Medical Science Cancer Institute) were used to establish intracranial glioma xenografts, and cells from an *IDH1/IDH2* wide type GBM were used as the cell model. A total of five hundred thousand cells were injected to each mouse under the guidance of a stereotactic instrument at coordinates relative to bregma: 2.0 mm posterior, 2.0 mm lateral, 3.0 mm ventral. Bioluminescence imaging was used to detect intracranial tumor growth on days 10, 17, 24 and 31. In the AURKA inhibition studies, mice were randomly divided into two groups (9 mice in the control group and 10 mice in the treatment group), receiving every other day, two 200  $\mu$ l applications of 25 mg/ml L-Arginine (Sigma, #A8094) or 200  $\mu$ l of 25 mg/kg MLN8237 (Selleck, #S1133) diluted in L-Arginine by oral gavage. When all mice in the control group were dead, the surviving mice in the treatment group were sacrificed and the brains were extracted and fixed in 10% formalin for 24 h, embedded in paraffin, and sectioned into 5  $\mu$ m slices. All experiments were conducted in accordance with animal protocols approved by the Institutional Animal Care and Use Committee at Tianjin Medical University. The data were normalized to bioluminescence detected at the initiation of treatment for each animal. Kaplan-Meier survival curves were plotted to analyze the survival outcomes between the control and the AURKA inhibited groups.

### **Statistical analyses**

For statistical analyses, all experiments were replicated at least 3 times as indicated in the figure legends. The mean and standard deviation (SD) of the results are shown in the graphs.

The two-tailed Student's t-test was employed to determine the statistical significance of differences between two groups unless otherwise described in the text. The one-way ANOVA was performed for comparisons in more than two groups. Survival analysis of patients or mice was performed using Kaplan-Meier plots. A log-rank (Mantel-Cox) test was used to compare the survival curves. Fisher's exact two-tailed test was performed for comparing the percentage of lagging chromosomes and centrosomes amplification errors. The statistical analyses were performed using GraphPad Prism 7 software or SPSS statistics 22. Statistical significances were established at  $P < 0.05$ ,  $P < 0.01$  and  $P < 0.001$ , labeled as \*, \*\* and \*\*\* respectively.

## Supplemental Figures

Fig. S1

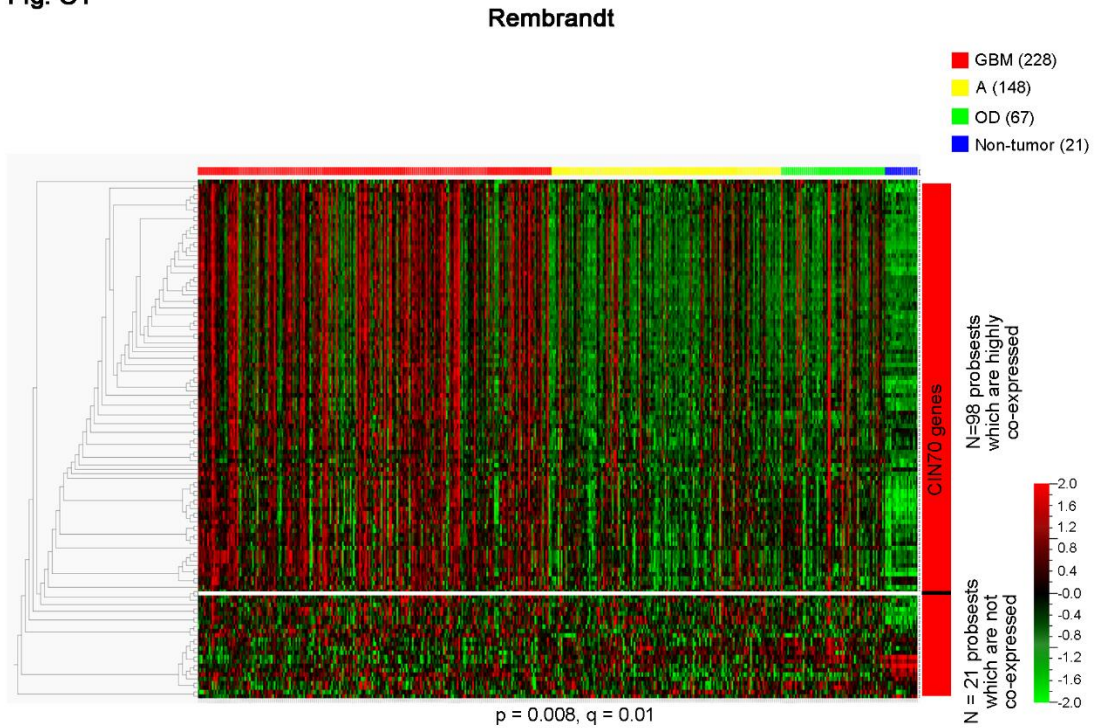

**Fig. S1. Only a subset of CIN70 members are co-expressed in glioma transcriptomes.** Supervised clustering based on histological classification between glioma samples and the CIN70 expression was performed in the REMBRANDT dataset. Heatmap showed that only a subset of CIN70 genes are co-expressed. Similar patterns were observed in GSE16011 and TCGA datasets. GBM, glioblastoma multiforme; A, astrocytoma; OD, oligodendroglioma.

Fig. S2

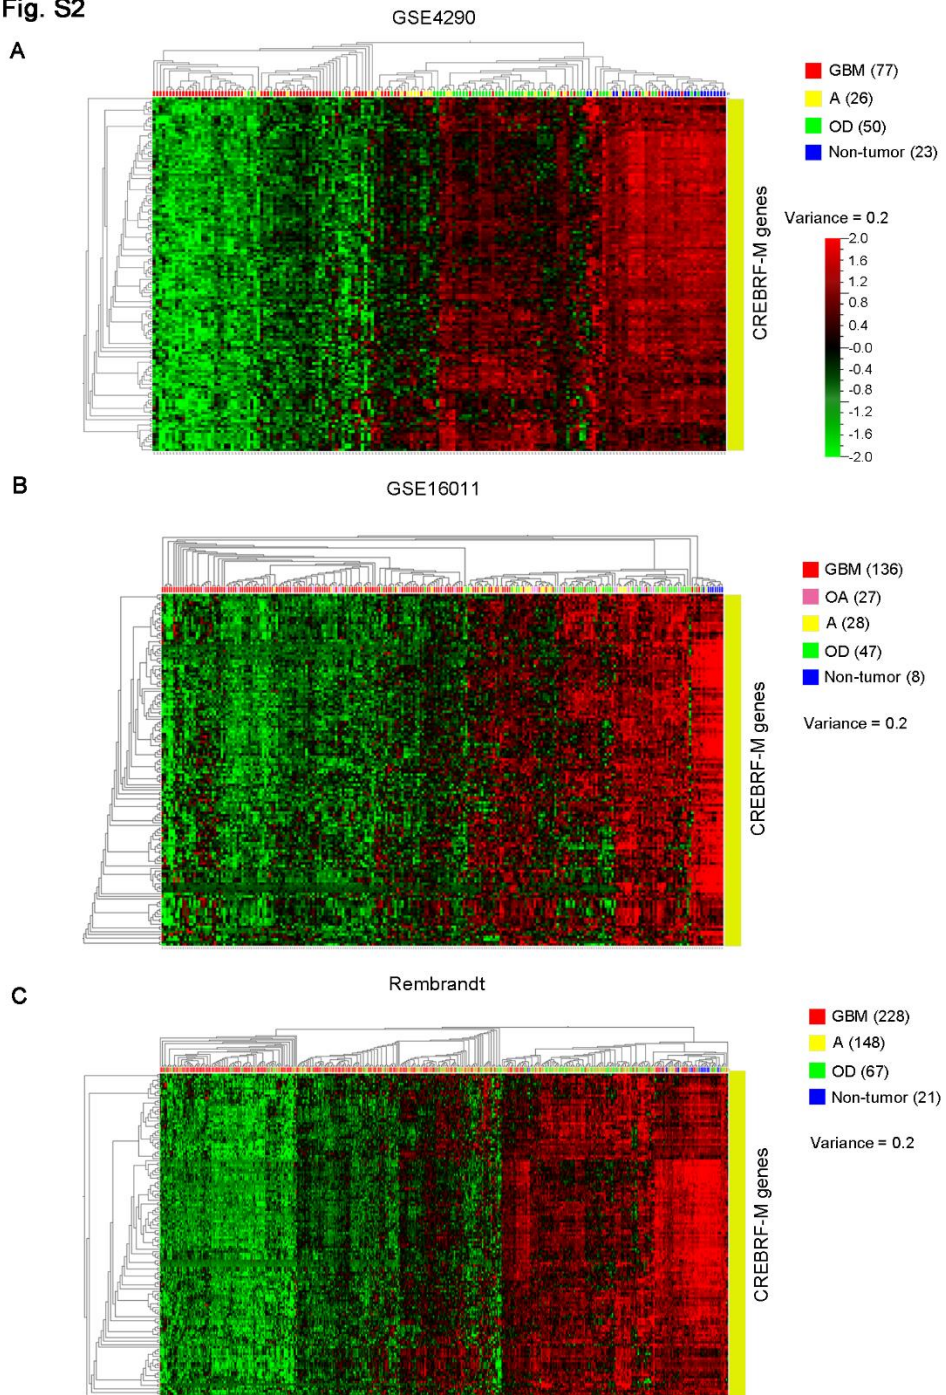

**Fig. S2. Enriched expression of CREBRF-M in normal brain tissues.**

CREBRF expression was negatively correlated to CDC20-M in the transcriptome datasets examined in this study. CREBRF-M was identified in GSE4290 as the genes co-expressed with CREBRF (235556\_at) at a PCC not less than 70%. Heatmaps of unsupervised hierarchical clustering between CREBRF-M and glioma samples in GSE4290 (**A**), GSE16011 (**B**) and REMBRANDT (**C**), with the exclusion of genes with standard deviations below 20% of the maximal standard deviation, show enriched expression of CREBRF-M in normal tumor brain tissue samples. GBM, glioblastoma multiforme; OA, oligoastrocytoma; A, astrocytoma; OD, oligodendroglioma.



**Fig. S3**

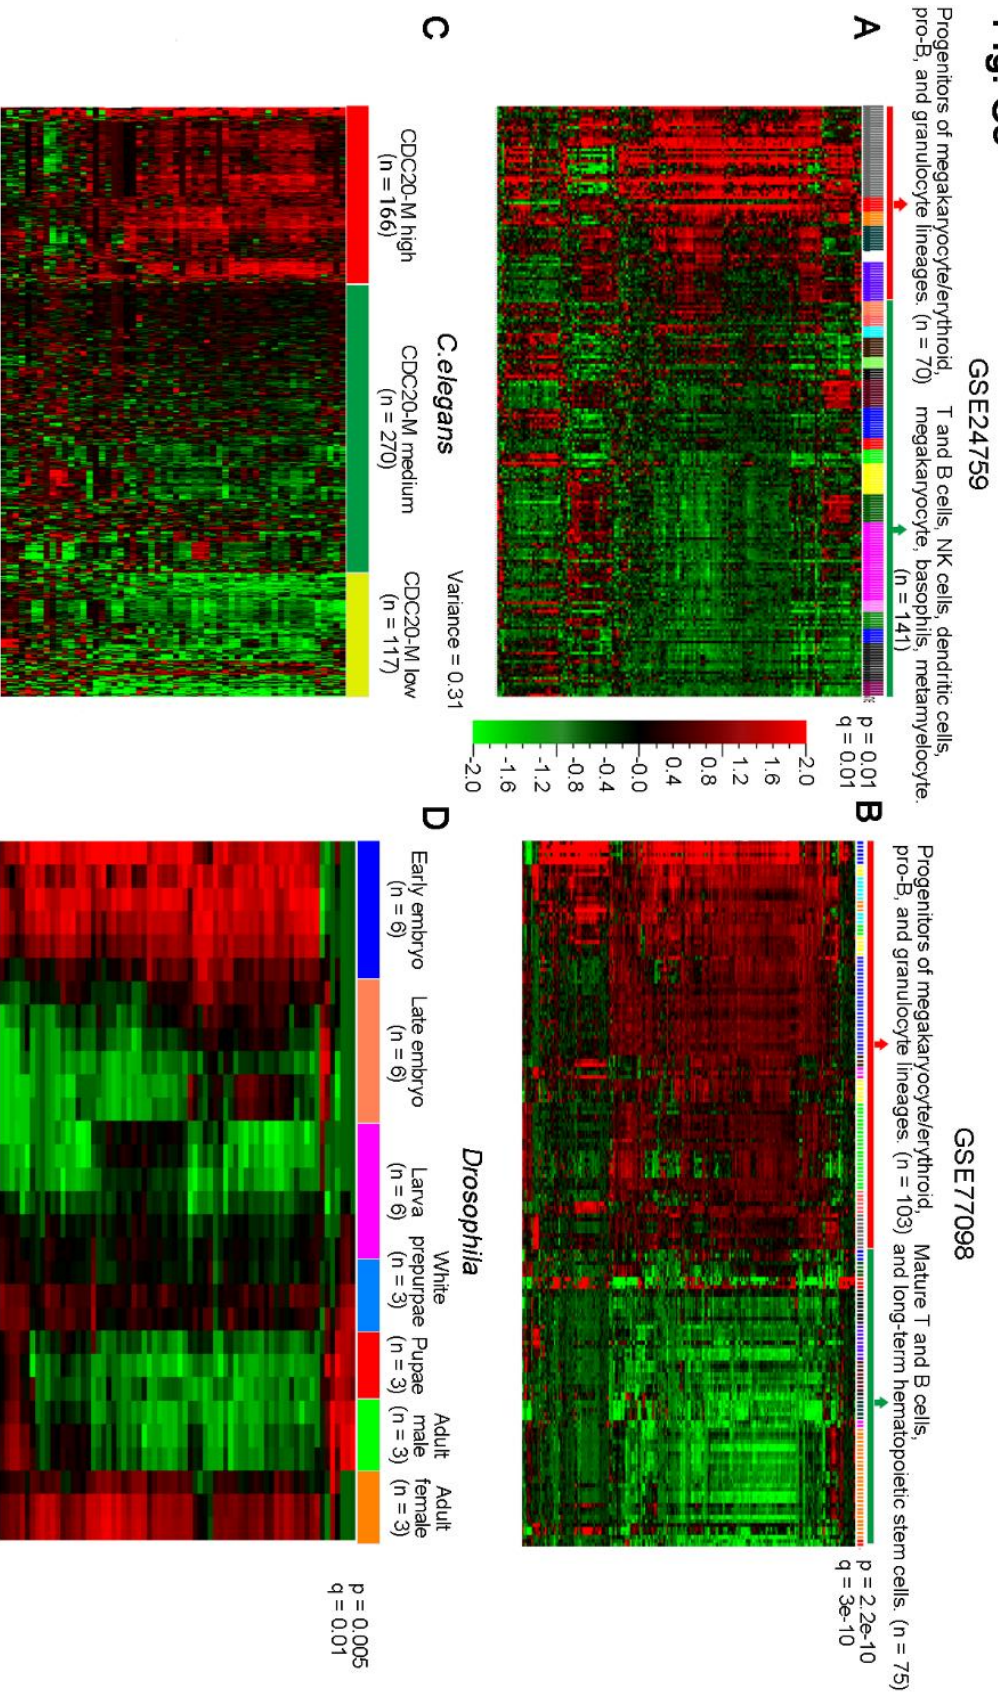

**Fig. S3. Characterization of CDC20-M as a species-conserved cell proliferation marker.**

(A) and (B) Heatmaps of supervised hierarchical clustering analysis of CDC20-M and samples performed in the transcriptome datasets of steady state human hematopoiesis (GSE24759) (A) and murine hematopoiesis (GSE77098) (B) are shown. Enriched CDC20-M expression was found in the progenitors of megakaryocyte/erythroid and granulocyte lineages and in pro-B progenitors. (C) Heatmap of unsupervised hierarchical clustering of *C. elegans* cultured under various growth conditions, or carrying different mutations. Samples were clustered according to CDC20-M expression. Variance = 0.31. (D) Heatmap of supervised clustering between CDC20-M expression and samples in the different stages of *Drosophila* life cycle is shown. Early embryo samples show the highest expression of CDC20-M. Enriched CDC20-M signature also indicates a high extent of cell proliferation.

Fig. S4 Rembrandt (Morphology diagnosis)

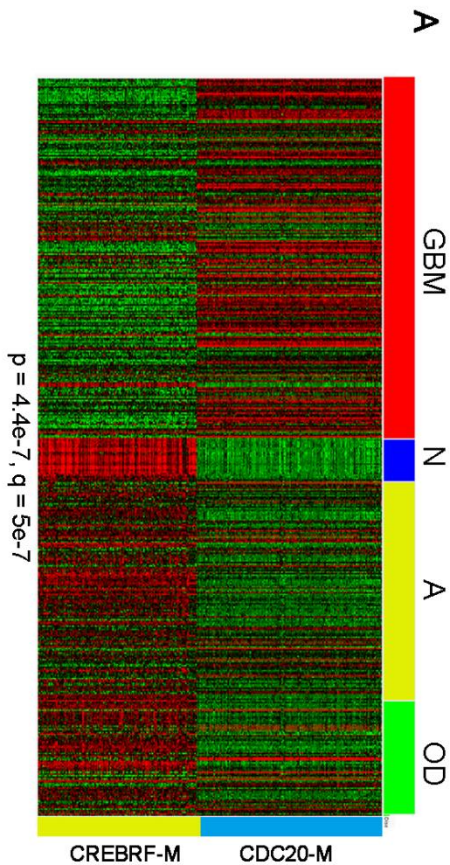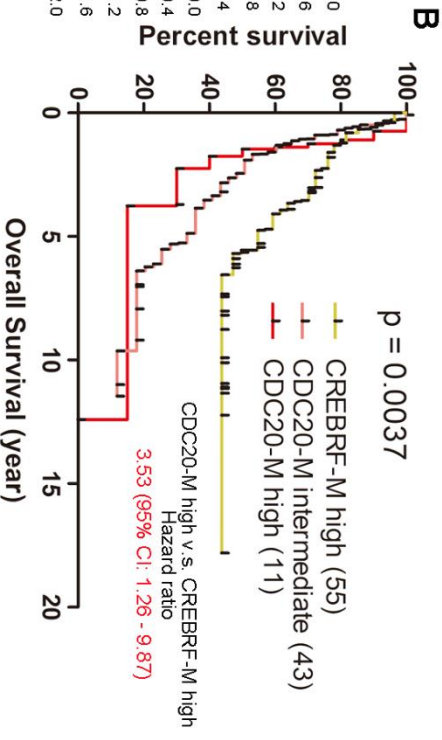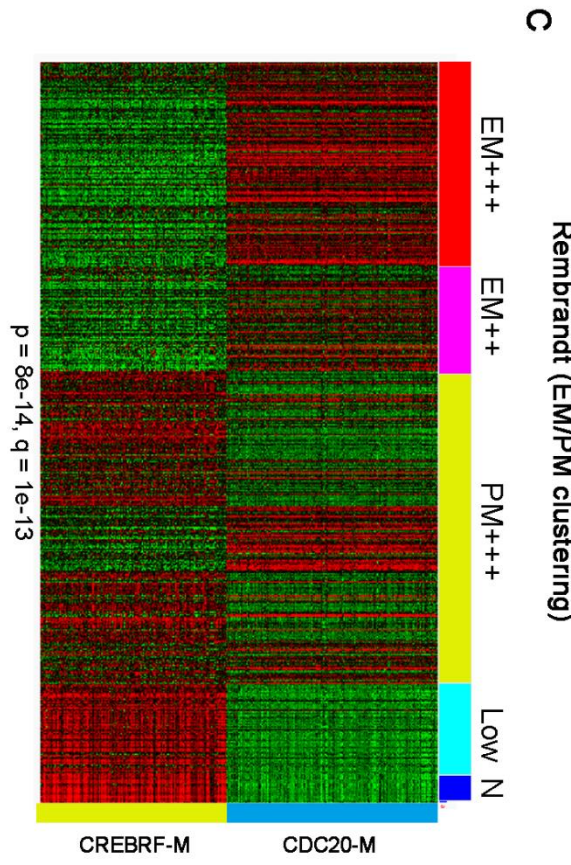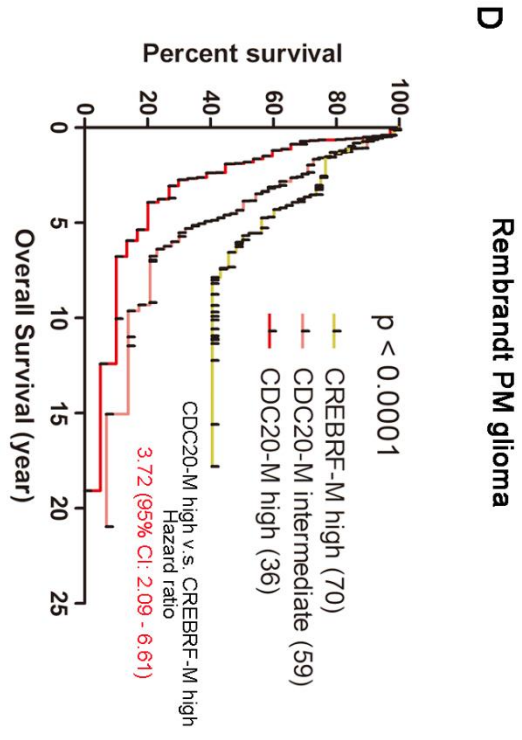

**Fig. S4. High CDC20-M expression marks poor prognosis in the same morphological subtypes or the EM/PM molecular subtypes.**

Heatmaps of CDC20-M and CREBRF-M expression profiles in glioma samples in Rembrandt dataset sorted according to morphological diagnosis (**A**), or EM/PM clustering (**C**) are shown. Among the grade II/III astrocytomas, gliomas with high or intermediate level of CDC20-M expression were associated with poorer prognosis compared to gliomas with high level of CREBRF-M expression (**B**), a similar trend was found among the PM gliomas (**D**). The hazard ratio between patients with high CDC20-M glioma and patients with high CREBRF-M gliomas is shown in panels (**B**) and (**D**), marked in red.

**Fig. S5**

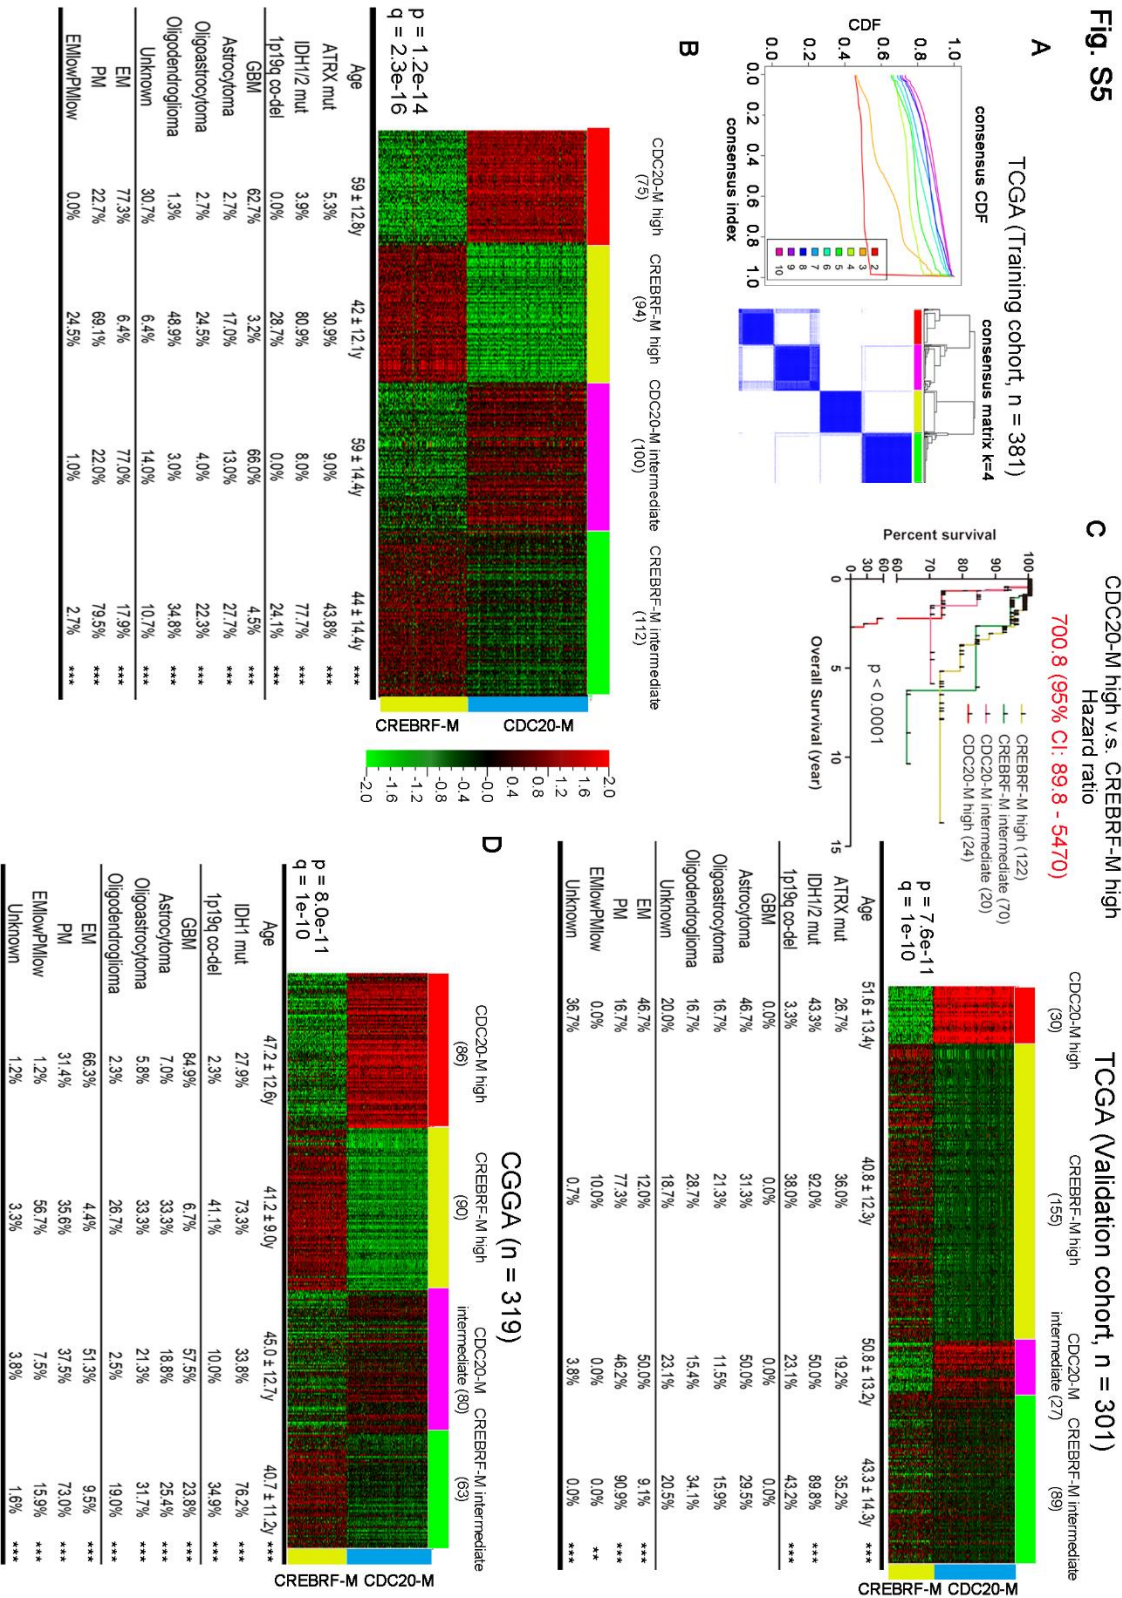

**Fig. S5. Unsupervised consensus clustering and SSP of gliomas with CDC20-M and CREBRF-M signature, and characteristics of each subtype in the TCGA training and validation cohorts, and in the CGGA dataset.**

(A) Results of unsupervised consensus clustering generated using partitioning around medoid between glioma samples, and the CDC20-M and CREBRF-M signature in the TCGA training cohort. The number of clusters (K) were individually assessed. (Left) Consensus CDF plots corresponding to the consensus matrices in the K ranging from 2 to 10. (Right) Consensus matrices for K = 4, which were the most stable clusters for TCGA training cohort. (B) The upper part shows the same heatmap as in Fig. 2B. Age at diagnosis, genomic characteristics, morphological diagnosis and EM/PM subtypes of each CDC20-M subgroup are shown in the lower part. \*\*\*:  $p < 0.001$  as analyzed in one-way ANOVA test for age comparison, and Fisher's exact test for all the other comparisons. (C) (Left) Kaplan-Meier plot of the overall survival for patients from each molecular subtype of the TCGA validation cohort is shown. The overall survival data were analyzed using log-rank tests. The hazard ratio between patients with high CDC20-M and patients with high CREBRF-M gliomas is shown on top of the survival curves. (Right) The upper part shows the heatmap of supervised clustering of the CDC20-M and CREBRF-M signature in the TCGA validation cohort. Samples were assigned to the nearest centroid as determined by Spearman correlation. Age at diagnosis, genomic characteristics, morphological diagnosis and EM/PM subtypes in each CDC20-M subgroup are shown in the lower part. \*\*\*:  $p < 0.001$  as analyzed in one-way ANOVA test for age comparison, and Fisher's exact test for all the other comparisons. (D) The upper part shows the same heatmap as in Fig. 2C. Age at diagnosis, genomic characteristics, morphological diagnosis and EM/PM subtypes in

each CDC20-M subgroup in the CGGA dataset are shown in the lower part. \*\*\*:  $p < 0.001$  as analyzed in one-way ANOVA test for age comparison, and Fisher's exact test for all the other comparisons.

Fig S6.

A

| CDC20-M cluster       | TCGA cluster |      |      |      |    |
|-----------------------|--------------|------|------|------|----|
|                       | LGr1         | LGr2 | LGr3 | LGr4 | NA |
| CDC20-M high          | 22           | 0    | 13   | 70   | 0  |
| CDC20-M intermediate  | 19           | 1    | 14   | 92   | 1  |
| CREBRF-M intermediate | 55           | 16   | 104  | 24   | 2  |
| CREBRF-M high         | 46           | 73   | 107  | 15   | 8  |

B

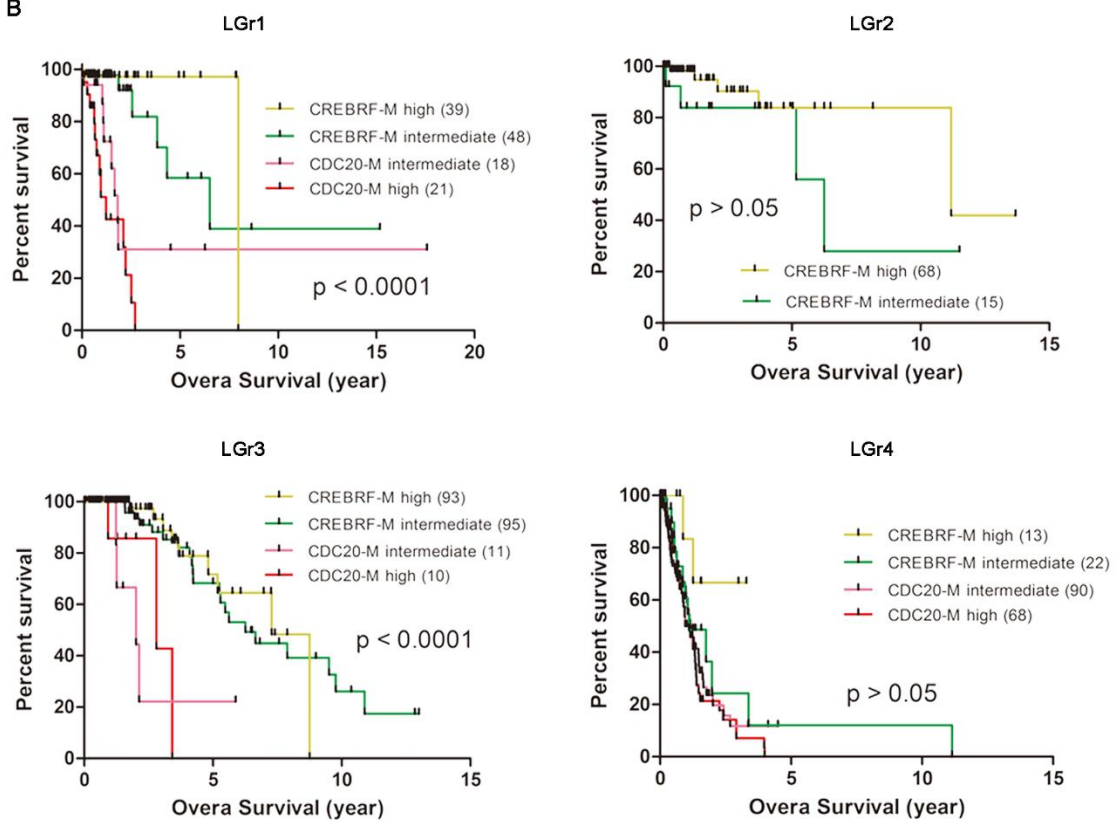



**Fig. S6. CDC20-M signature-based clustering distinguishes the lower grade gliomas with poorer from those with better prognosis within the *IDH* mutated LGr1 and LGr3 clusters.**

(A) Cross-labeling of lower grade glioma samples by the TCGA clustering or by the CDC20-M/CREBRF-M clustering. (B) According to CDC20-M/CREBRF-M clustering, the overall survival data were reanalyzed using log-rank tests. In the good prognostic LGr1 and LGr3 clusters, patients of gliomas with high or intermediate CDC20 expression showed worse prognosis compared to patients of gliomas with high or intermediate CREBRF-M expression.

Fig. S7

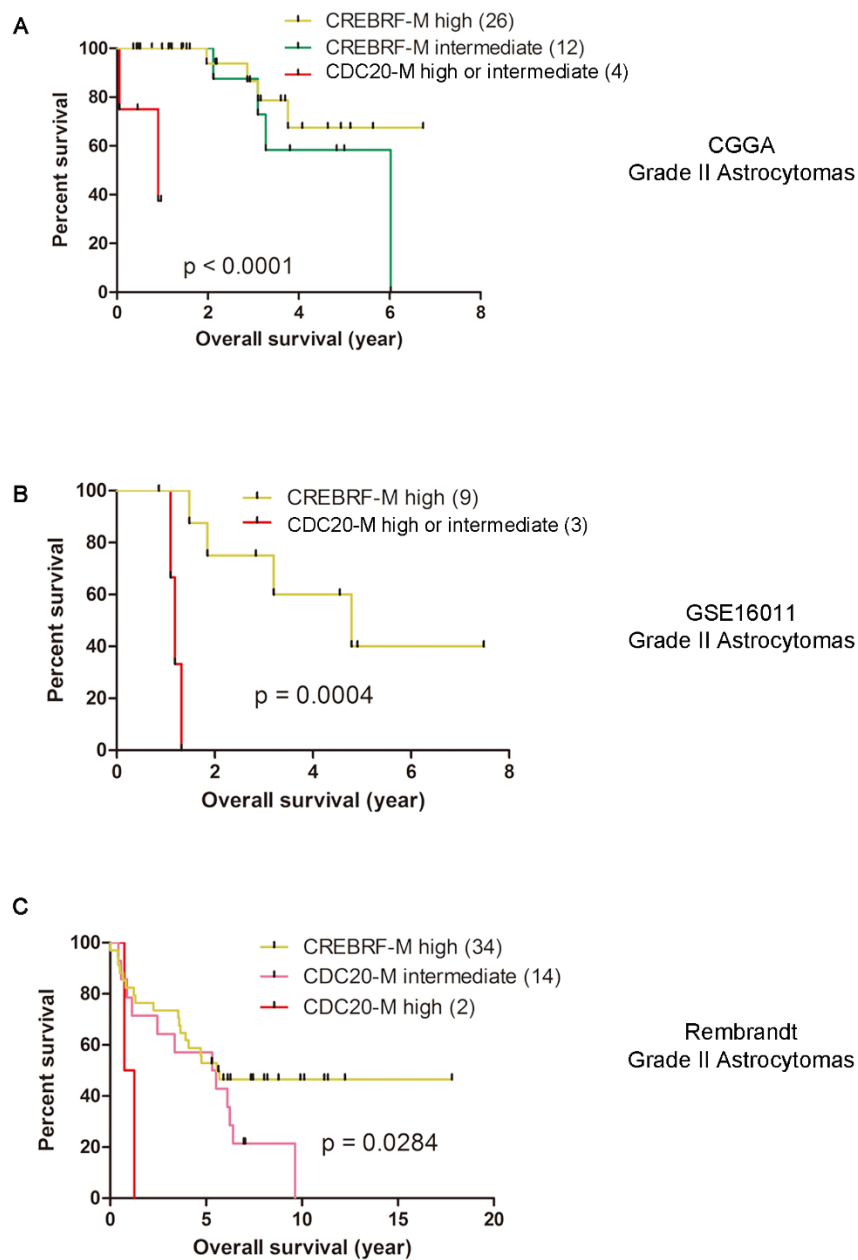

**Fig. S7. Rapid progression of grade II astrocytomas with high CDC20-M expression.**

Overall survival analysis was performed in patients with grade II astrocytomas stratified according to the CDC20-M/CREBRF-M clustering. P values of log-rank test are shown.

Fig. S8

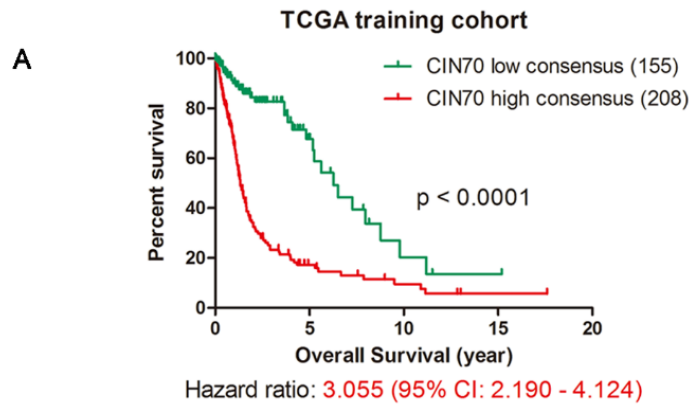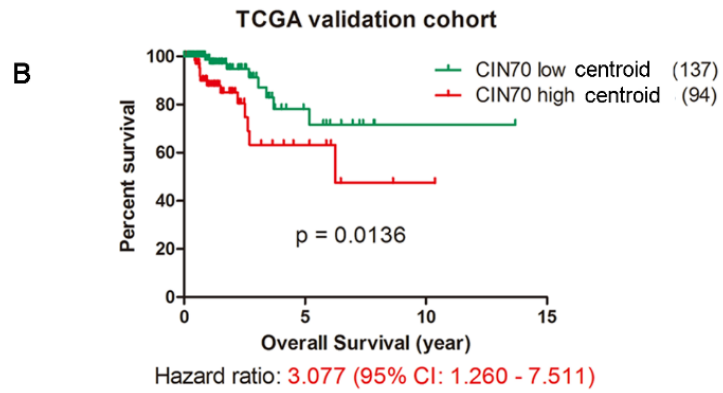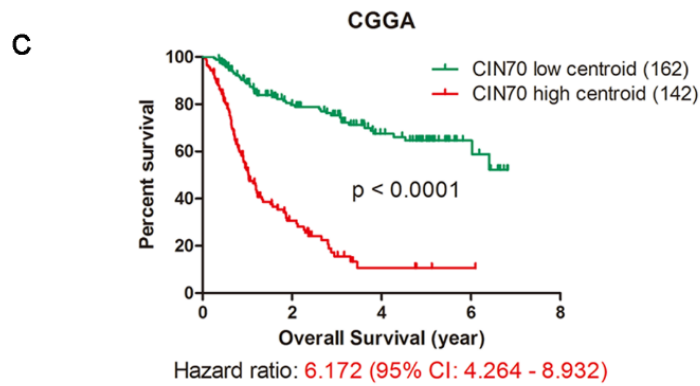

**Fig. S8. Kaplan-Meier plot of the overall survival for patients from the TCGA training (A), TCGA validation (B), and CGGA (C) datasets classified according to CIN70 signature.**

Samples in the TCGA training dataset were classified using CIN70 signature-based unsupervised consensus clustering, and served as a basis for the calculation of centroid for CIN70 high or low signature. Subsequently, CIN70 high or low gliomas in the TCGA validation and CGGA dataset were identified using SSP. The overall survival data were analyzed using log-rank test. The hazard ratio between patients with high CIN70 glioma and patients with low CIN70 gliomas is shown under the survival curves of each dataset.

Fig. S9

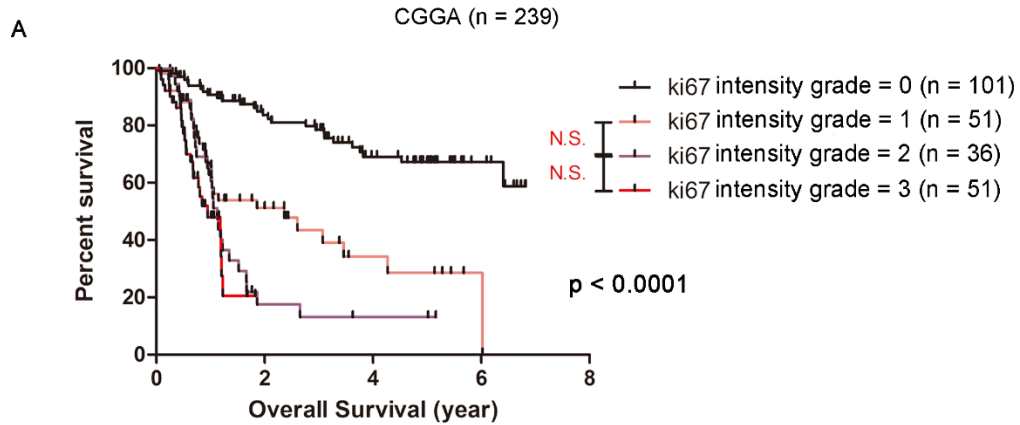

B

| CDC20-M cluster       | Ki67 intensity grades |     |     |     |
|-----------------------|-----------------------|-----|-----|-----|
|                       | = 0                   | = 1 | = 2 | = 3 |
| CDC20-M high          | 6                     | 18  | 12  | 30  |
| CDC20-M intermediate  | 10                    | 18  | 15  | 14  |
| CREBRF-M intermediate | 22                    | 9   | 7   | 6   |
| CREBRF-M high         | 63                    | 6   | 2   | 1   |

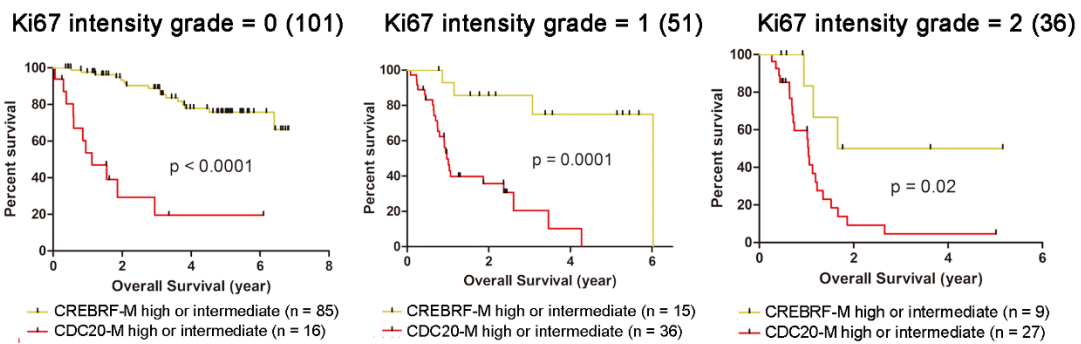

**Fig. S9. CDC20-M signature outperforms Ki-67 immunohistochemical staining in predicting prognosis of glioma patients.**

(A) Overall survival data of the 239 CGGA glioma patients were analyzed according to the extent of Ki-67 staining. Samples containing <5%, 5%-30%, 30%-50% and >50% Ki67-positive cells were categorized into intensity grades 0, 1, 2 and 3, respectively. (B) Cross-labelling between CDC20-M/CREBRF-M clustering and Ki-67 staining intensity subgroups. Within all subgroups of Ki-67 staining intensity grades of 0 to 2, gliomas with high CDC20-M expression consistently showed poorer overall survival compared to those with high CREBRF-M expression. The overall survival data were analyzed using log-rank test. Gliomas with Ki-67 staining intensity grade 3 were excluded from the survival analysis because too few CREBRF-M high or intermediate samples were found in this subgroup.

Fig. S10

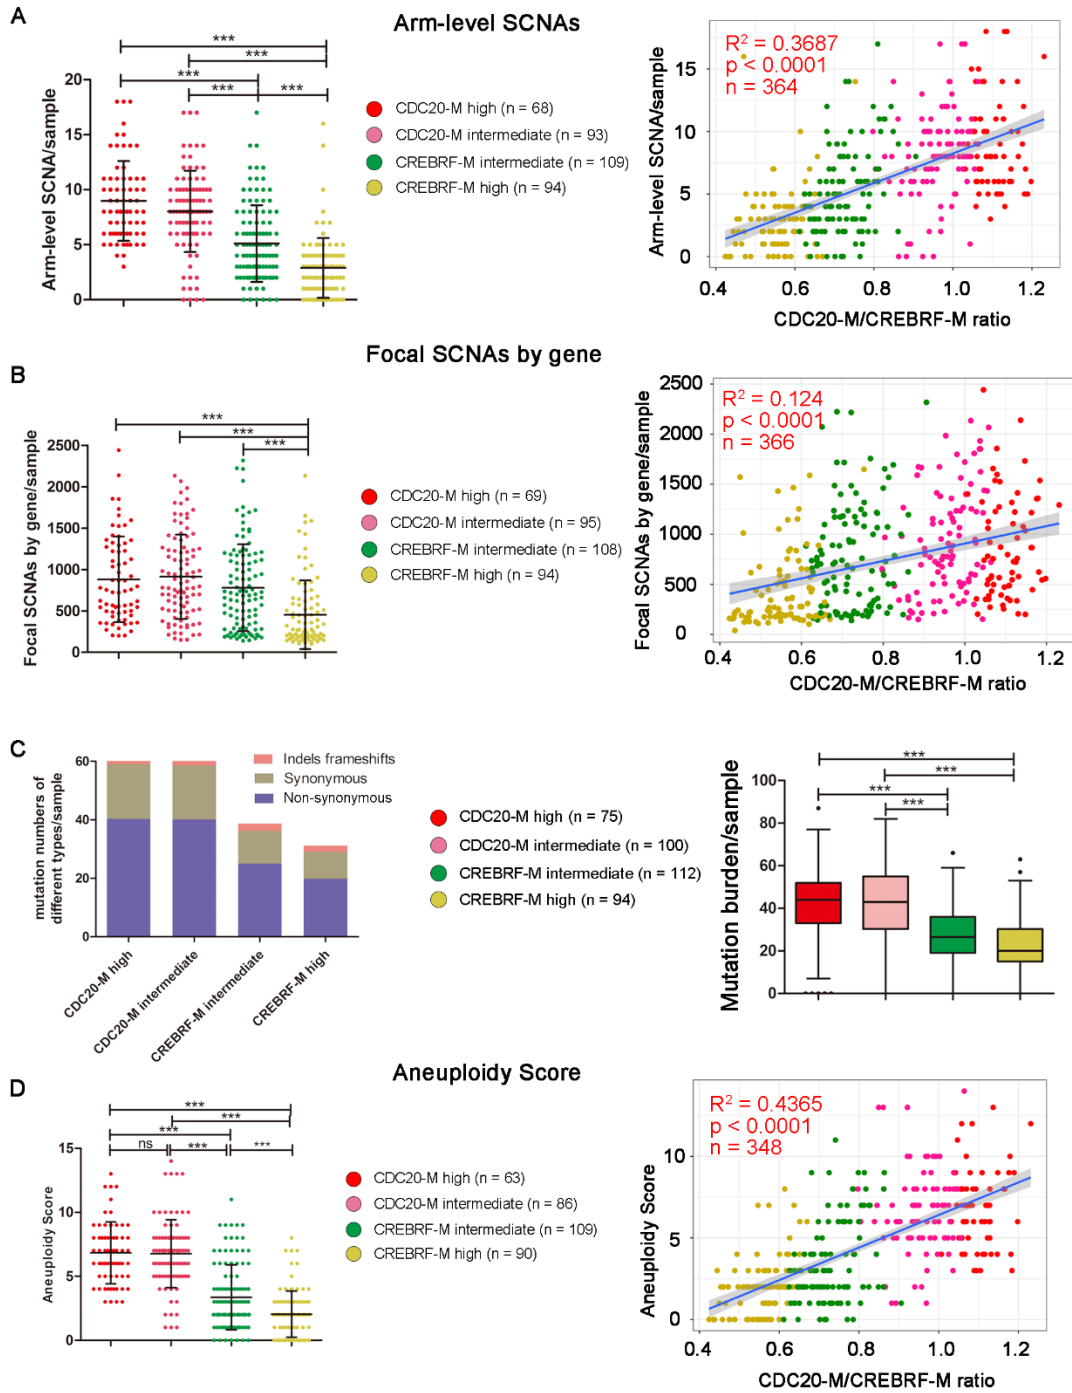

**Fig. S10. High CDC20-M signature correlates to the extent of arm-level or focal SCNA, non-synonymous mutation and aneuploidy.**

(A) (Left) Extent of arm-level SCNAs per sample in the CDC20-M defined glioma subgroups of the TCGA training cohort. \*\*\*:  $p < 0.001$ , unpaired two-sided Student's t-test. (Right) Linear regression analysis between the ratio of CDC20-M/CREBRF-M and arm-level SCNAs in all samples analyzed in the left panel. Regression coefficient ( $R^2$ ), P value and number of samples (N) are indicated. (B) (Left) Extent of focal-level SCNAs by gene per sample in the CDC20-M defined glioma subgroups of the TCGA training cohort. \*\*\*:  $p < 0.001$ , unpaired two-sided Student's t-test. (Right) Linear regression analyses between the ratio of CDC20-M/CREBRF-M and focal-level SCNAs by gene in all samples analyzed in the left panel. Regression coefficient ( $R^2$ ), P value and number of samples (N) are indicated. (C) (Left) Average numbers of indels/frameshifts, synonymous and non-synonymous mutations per sample in the CDC20-M/CREBRF-M clusters in the TCGA training cohort. (Right) Box plot of mutation burden (non-synonymous and indels/frameshifts mutations) in each CDC20-M/CREBRF-M group of TCGA training cohort. \*\*\*:  $p < 0.001$  as analyzed in one-way ANOVA test. (D) (Left) Extent of aneuploidy score in the CDC20-M defined glioma subgroups of the TCGA training cohort. \*\*\*:  $p < 0.001$ , unpaired two-sided Student's t-test. (Right) Linear regression analysis between the ratio of CDC20-M/CREBRF-M and aneuploidy score in all samples analyzed in the left panel. Regression coefficient ( $R^2$ ), P value and number of samples (N) are indicated.



Fig. S11

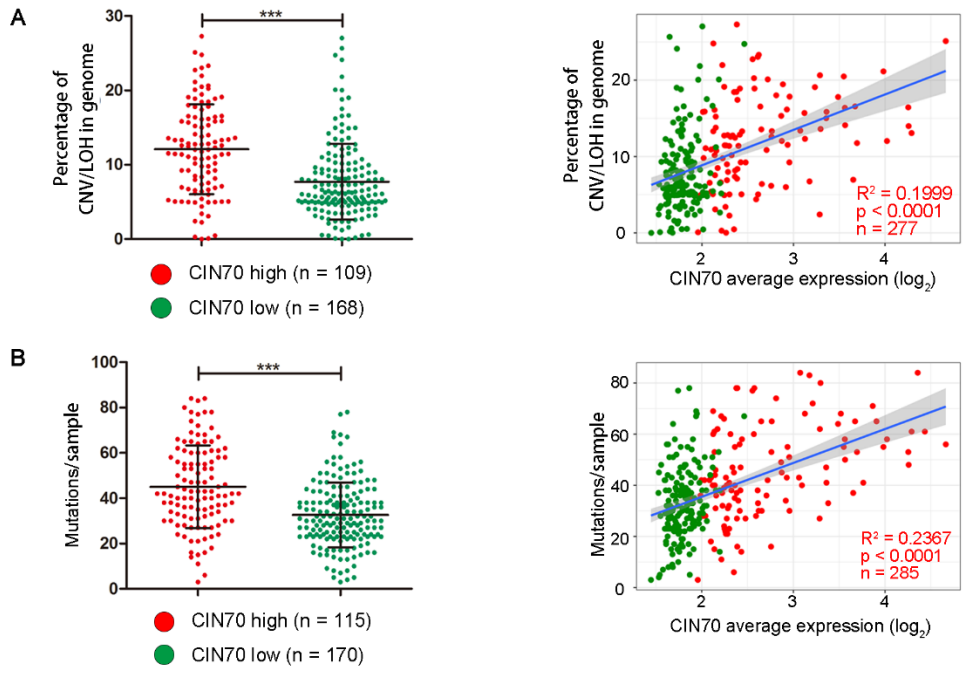

**C TCGA validation cohort**

|                       | Percentage of CNV/LOH in genome < 10% (n = 169) |                       | P value  |
|-----------------------|-------------------------------------------------|-----------------------|----------|
| CREBRF-M high         | 68.0% (115)                                     | 94.7% (160)           | < 0.0001 |
| CREBRF-M intermediate | 26.6% (45)                                      | CIN70 low 76.3% (129) |          |
| CDC20-M intermediate  | 4.1% (7)                                        | 5.3% (9)              |          |
| CDC20-M high          | 1.2% (2)                                        | CIN70 high 23.7% (40) |          |

**D TCGA validation cohort**

|                       | Mutation/sample < 40 (n = 178) |                       | P value  |
|-----------------------|--------------------------------|-----------------------|----------|
| CREBRF-M high         | 64.0% (114)                    | 93.3% (166)           | < 0.0001 |
| CREBRF-M intermediate | 29.2% (52)                     | CIN70 low 71.3% (127) |          |
| CDC20-M intermediate  | 5.6% (10)                      | 6.7% (12)             |          |
| CDC20-M high          | 1.1% (2)                       | CIN70 high 28.1% (51) |          |

**Fig. S11. Glioma subtypes defined by the CIN70 signature are less distinct in the extent of their chromosomal abnormalities and mutation burden.**

(A) and (B) (Left) the extent of chromosomal abnormalities (A) or mutation burden (B) in the CIN70 signature-defined glioma subgroups in the TCGA validation cohort. \*\*\*:  $p < 0.001$  as analyzed using unpaired two-sided Student's t-test. (Right) Linear regression analysis between the average  $\log_2$  expression of CIN70 signature and the extent of chromosomal abnormalities (A) or mutation burden (B) in glioma samples. The same color codes were used in all panels. Regression coefficient ( $R^2$ ), P value and number of samples (N) are indicated. (C) CIN70 signature-based glioma subtypes were less distinct in the extent of chromosomal abnormalities compared to the CDC20-M-based glioma subtype. This table shows number of samples in each subtype with a percentage of CNV/LOH in genome  $< 10\%$  in the TCGA validation cohort. P value was analyzed using Fisher's exact test. (D) CIN70 signature-based glioma subtypes were less distinct in the extent of mutation burden compared to the CDC20-M-based glioma subtype. This table shows number of samples in each subtype with less than 40 mutations in the TCGA validation cohort. P value was analyzed using Fisher's exact test.

Fig. S12 A

CDC20-M high (67 samples with SNP 6.0 data)

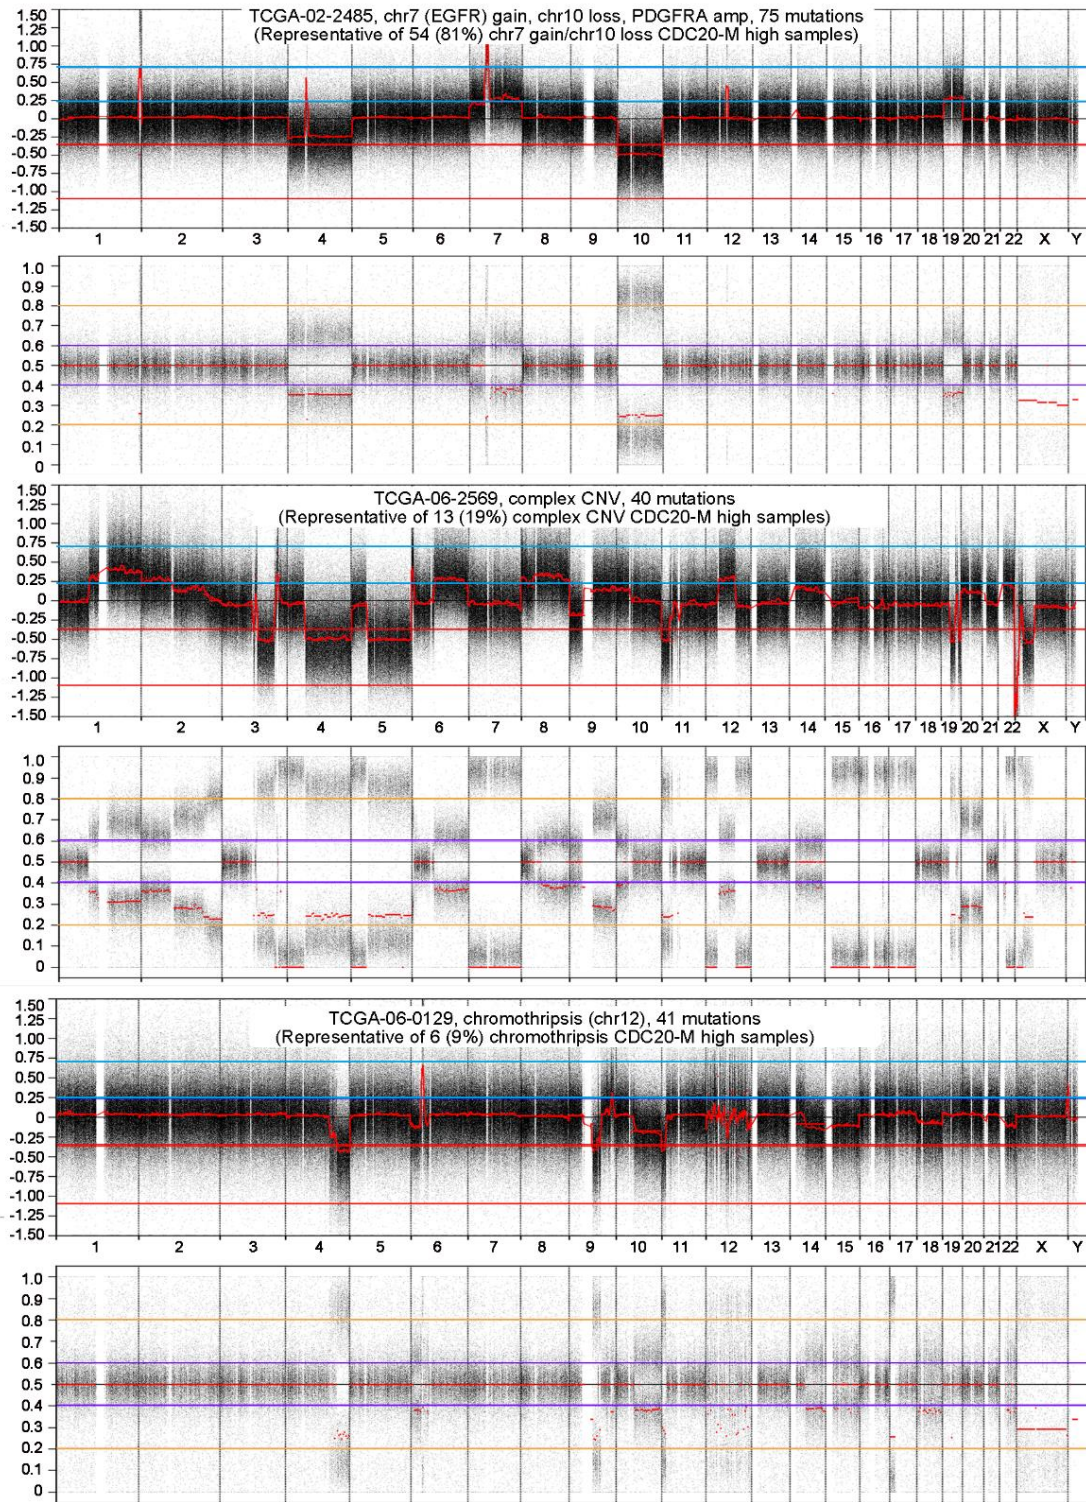

Fig. S12 B

CREBRF-M high (87 samples with SNP 6.0 data)

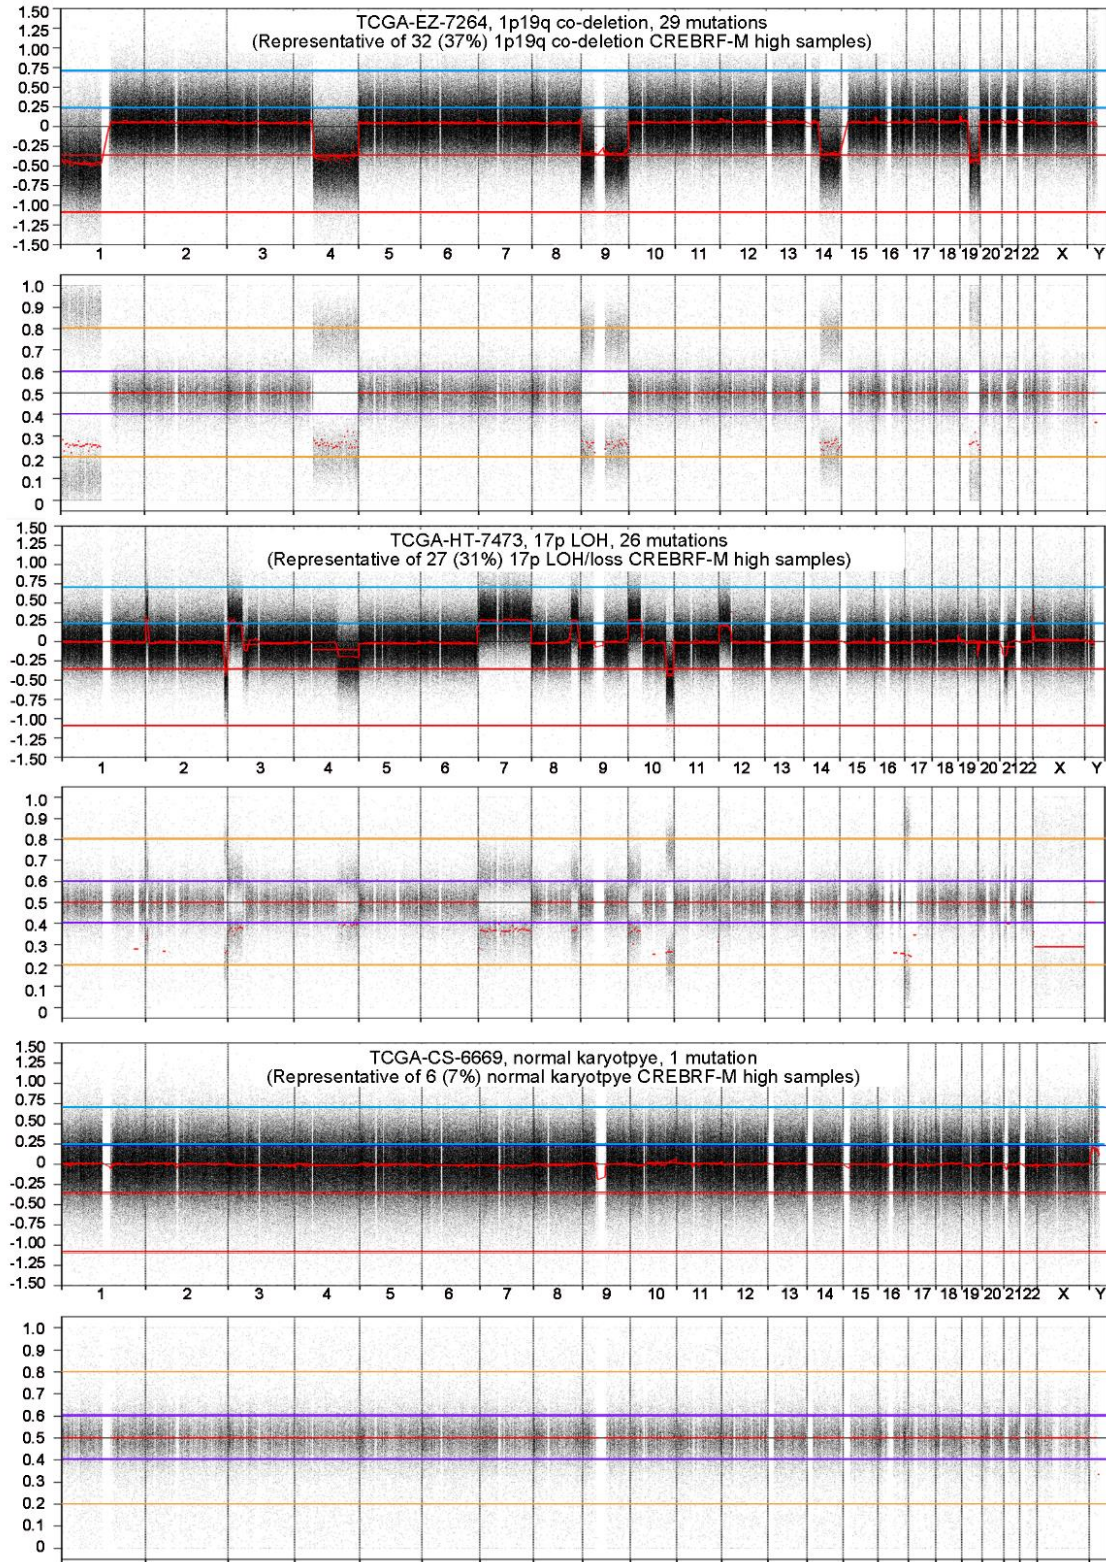

**Fig. S12. Distinct patterns and severities of chromosomal abnormalities between gliomas with high CDC20-M expression and gliomas with high CREBRF-M expression.**

The whole chromosome view of three representative CDC20-M high glioma samples (**A**) and three representative CREBRF-M high glioma samples (**B**) are shown. For each sample, the upper plot shows the log ratio of copy number aberrations and the lower plot shows allelic events. In the upper plot, each dot corresponds to a probe on the array. The “call” thresholds for single and higher copy number gain or loss are shown as blue and red horizontal lines, respectively in the copy number (log ratio) plots. The red line in the plot are the output of the call algorithm. For the B allele frequency plot in the bottom, the brown and purple lines mark the thresholds for LOH and allelic imbalance regions, respectively.

Fig. S13

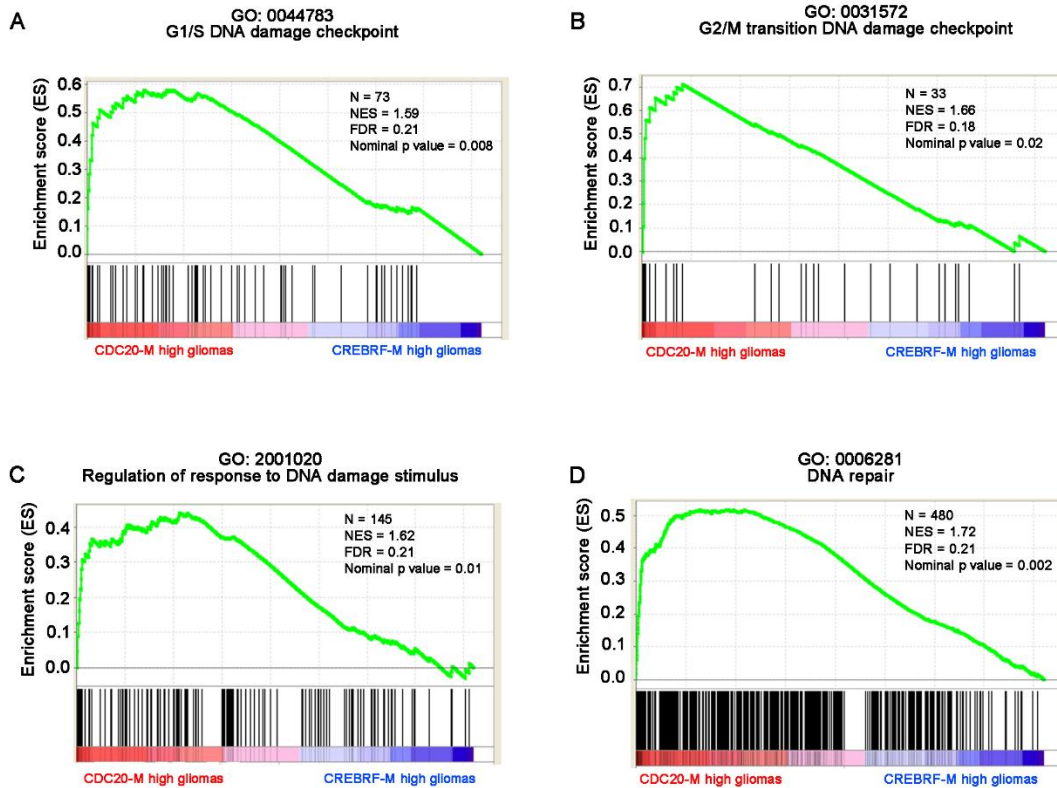

**Fig. S13. GSEA plots demonstrating enrichment of the DNA damage response signatures in the CDC20-M high gliomas.**

Gene sets involved in G1/S DNA damage checkpoint (**A**), G2/M DNA damage checkpoint (**B**), regulation of response to DNA damage stimulus (**C**) and DNA repair (**D**) are enriched in CDC20-M high gliomas. Gene sets were obtained from GO Biological Process Ontology (<http://www.geneontology.org/>). Number of genes, normalized enrichment scores (NES), false discovery rate (FDR) and nominal p value of gene set are indicated in each panel. Data are derived from comparing the transcriptomes of the CDC20-M high gliomas with the transcriptomes of the CREBRF-high gliomas in the TCGA training cohort.

Fig. S14

CDC20-M high

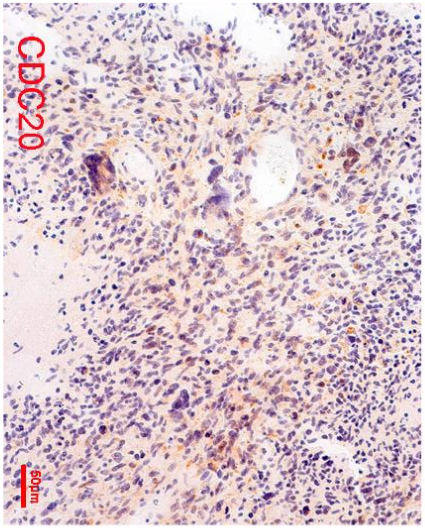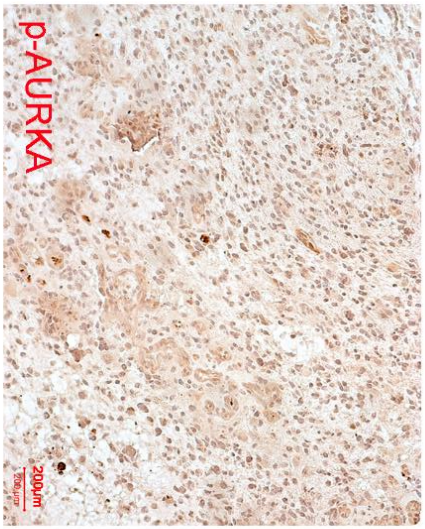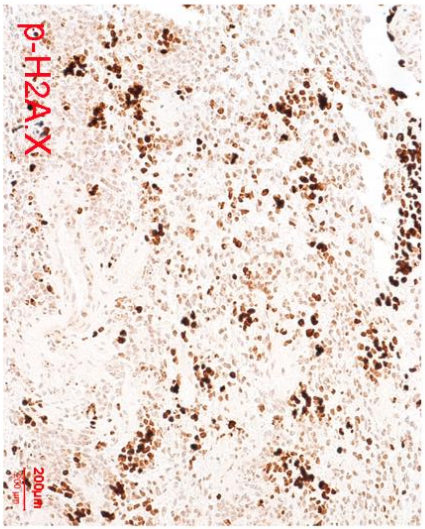

CREBRF-M high

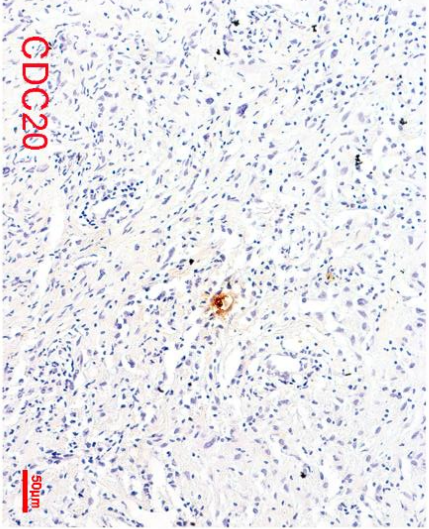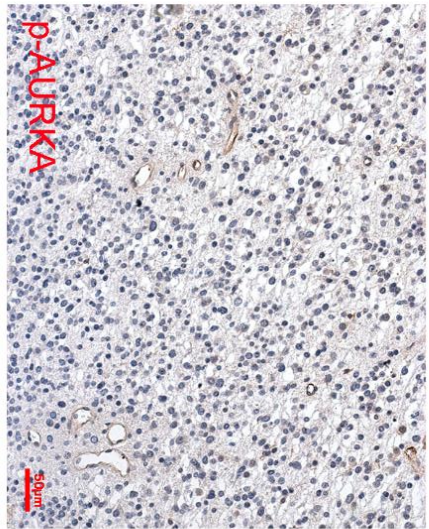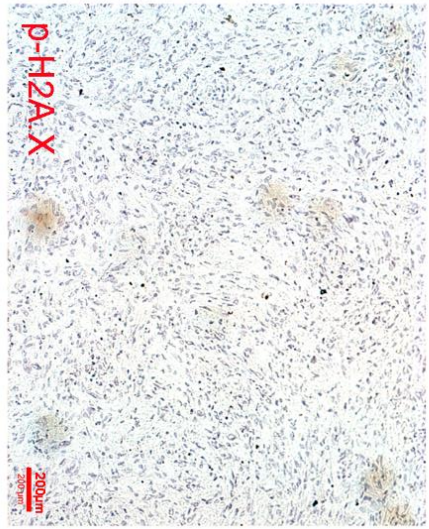

**Fig. S14. CDC20-M high gliomas show higher expression of CDC20, p-AURKA and p-H2A.X.**

Representative images of immunohistochemical staining of CDC20, p-AURKA and p-H2A.X in glioma tissues classified according to CDC20-M classification in CGGA. Scale bars are indicated in figures. Results are representative of two independent experiments (n = 3 to 6 samples for each staining per group).



Fig. S15

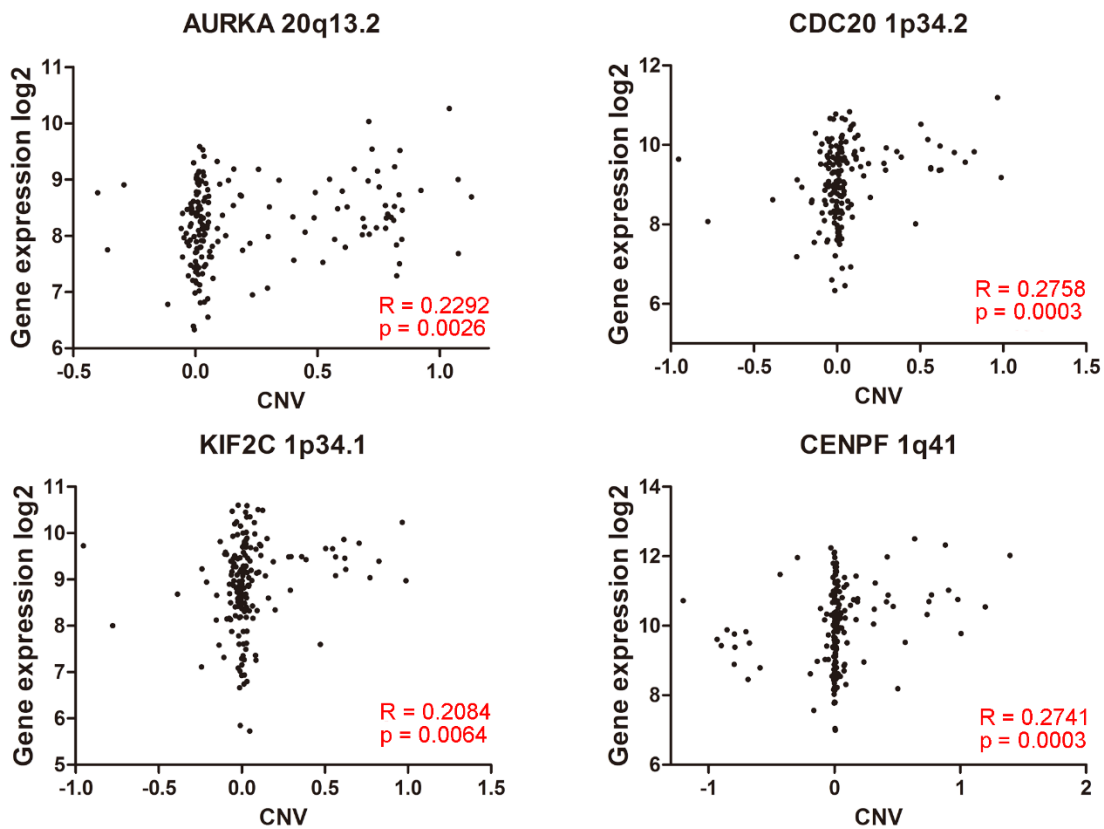

**Fig. S15. Gene dosage-dependent expression of AURKA, CDC20, KIF2C and CENPF in CDC20-M high/intermediate gliomas of TCGA training cohort.**

Core members of CDC20-M with SCNAs resulting in gene dosage-dependent expression in gliomas with high or intermediate expression levels of CDC20-M were identified using Spearman's rank correlation analysis. Correlation coefficients (R) and their P values are indicated.

**Fig. S16**

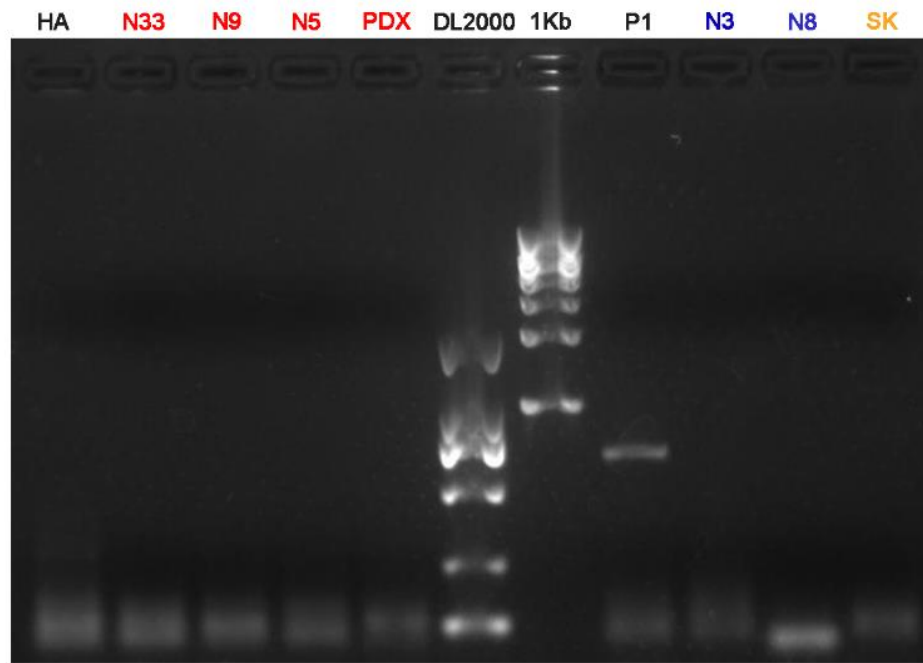

**Fig. S16. FGFR3-TACC3 fusion transcript was not detected in all cell lines analyzed in this study.**

FGFR3-TACC3 specific RT-PCR with cDNA derived from the cell lines were performed. pLOC-F3T3 plasmid (20), encoding FGFR3-TACC3 fusion transcript, was used as the positive control (P1).

Fig. S17

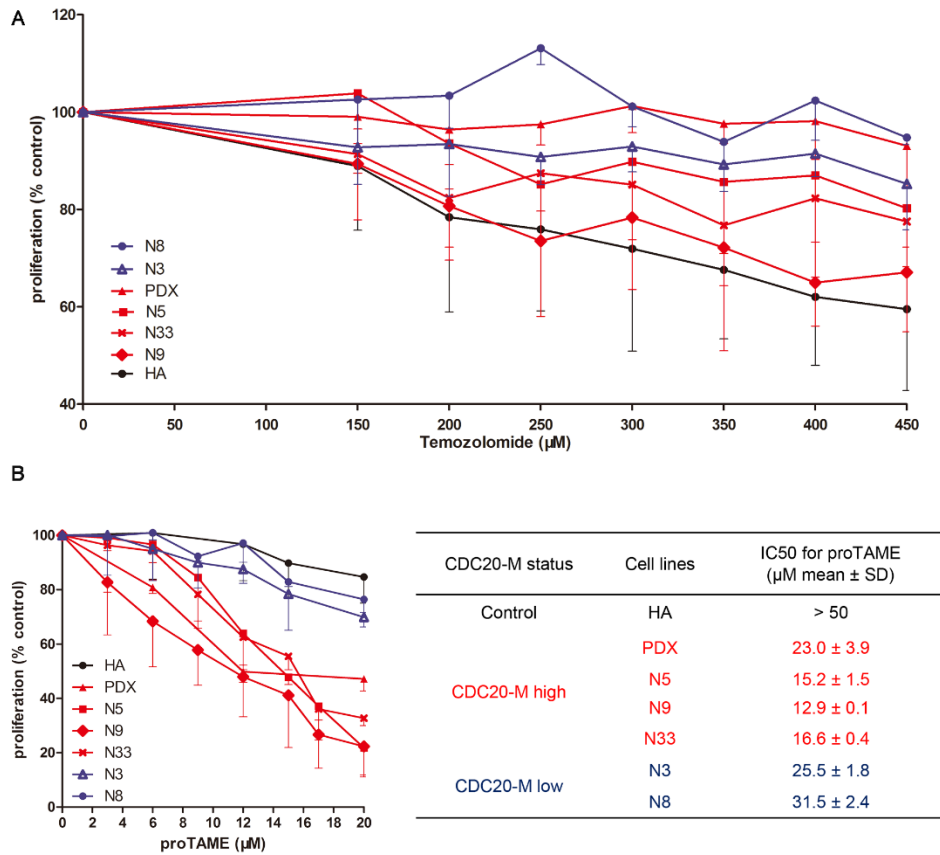

**Fig. S17. Sensitivity of glioma cell lines to temozolomide and proTAME.**

(A) Log-phase glioma cells were treated with temozolomide at varying concentrations for three days. Glioma lines were not more sensitive than controls to treatment with temozolomide. Data shown are averages of three independent experiments. Each concentration contained six replicates in one experiment. Error bars indicate SD. (B) (Left) Log-phase cell lines were treated with proTAME at varying concentrations for 24 h. CDC20-M high glioma cell lines were more sensitive to proTAME compared with CDC20-M low glioma cell lines and HA. Data shown are averages of three independent experiments, each concentration was assessed in six replicates in one experiment, and error bars indicate SD. (Right) The table shows the summary of IC50 concentrations of proTAME for all cell lines tested.

**Fig. S18**

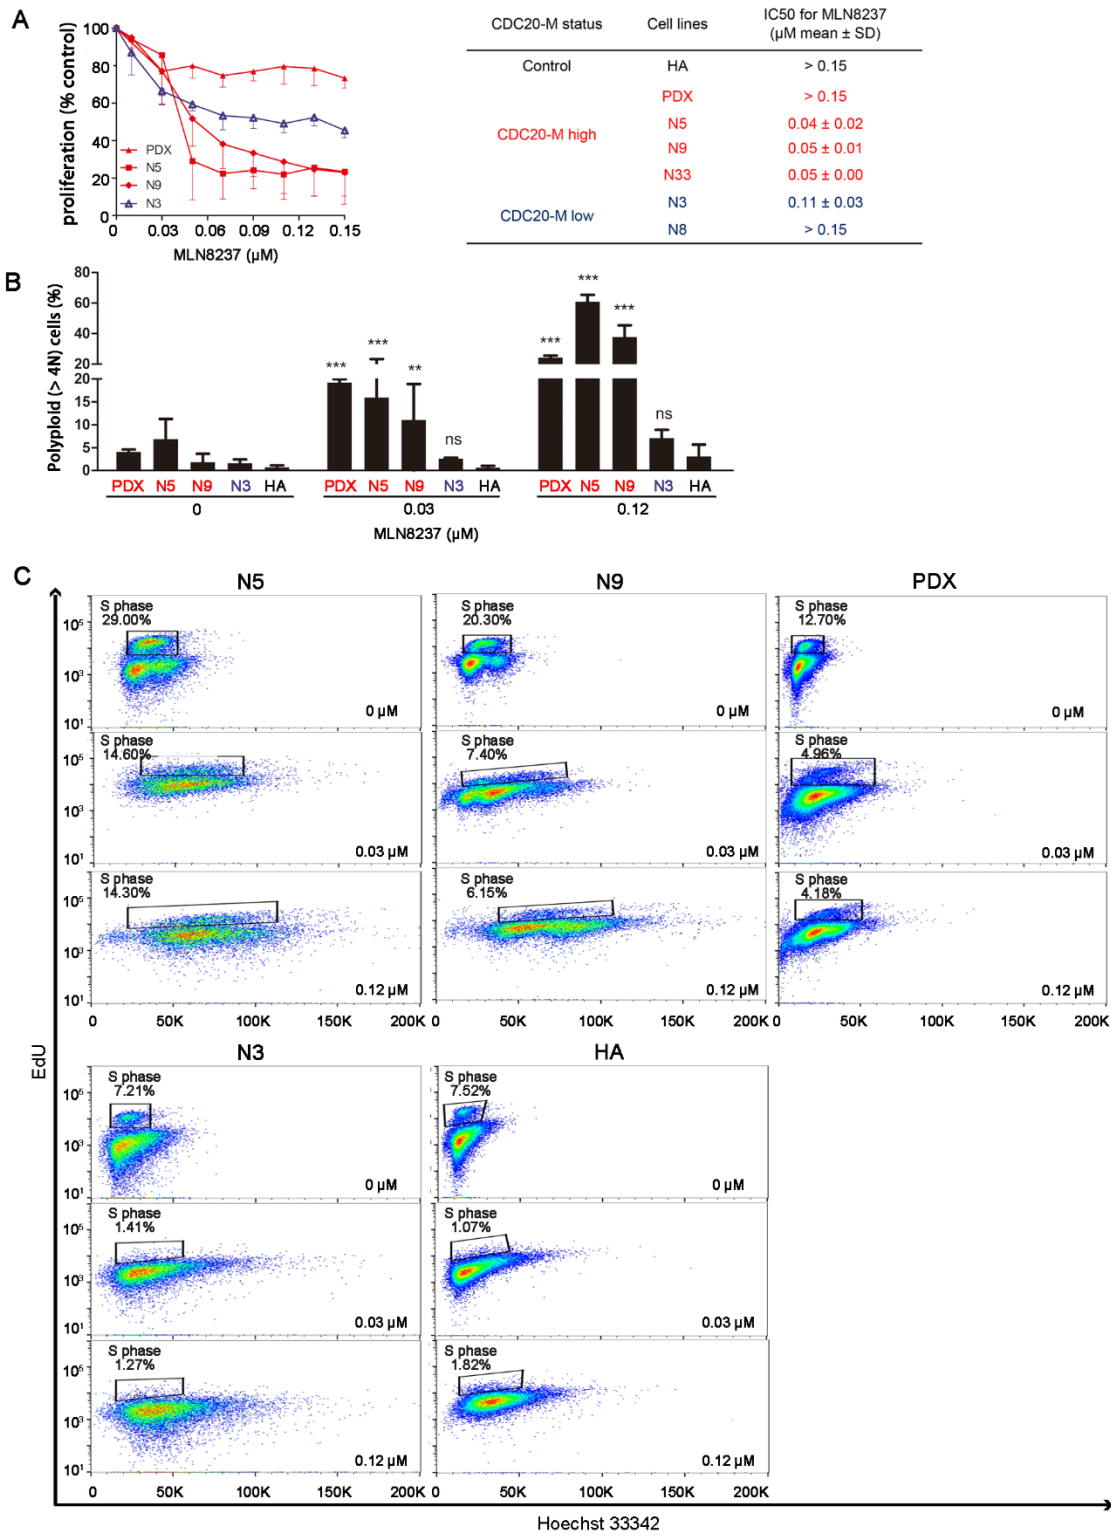

**Fig. S18. AURKA inhibition induced proliferation arrest and polyploidization in CDC20-M high glioma cells.**

(A) (Left) Log-phase glioma cell lines were treated with MLN8237 at varying concentrations for 12 days. Most of the CDC20-M high glioma cell lines were more sensitive to MLN8237 compared with CDC20-M low glioma cell lines. Data shown are averages of three independent experiments. Each concentration was assessed in six replicates in one experiment, and error bars indicate SD. (Right) The table shows the summary of IC<sub>50</sub> concentrations of MLN8237 for all cell lines tested. (B) Quantification of cells showing polyploidization (with > 4N DNA content) for glioma cell lines cultured with DMSO (control) or MLN8237 for 72 h. Error bars in the plots represent the mean  $\pm$  SD of three independent experiments. \*\*\*:  $p < 0.001$ ; \*\*:  $p < 0.01$ , and ns:  $p > 0.05$ , as compared to HA in each concentration; two-way ANOVA test. (C) Cell proliferative index (% of EdU-positive S phase cells) and polyploidization were assessed in N5, N9, PDX, N3 and HA cells with or without MLN8237 treatment at the indicated doses for three days. Results are representative of technical triplicates.

Fig. S19

Control

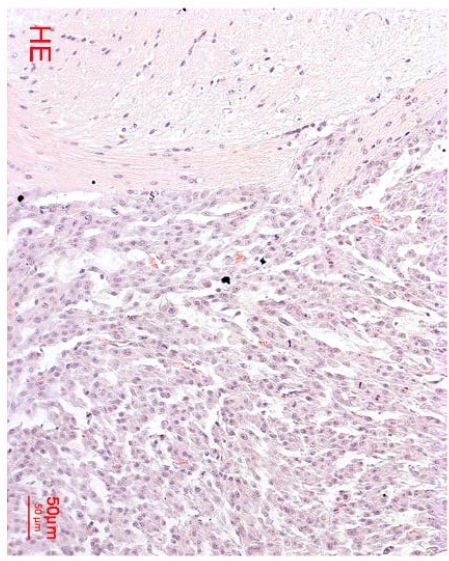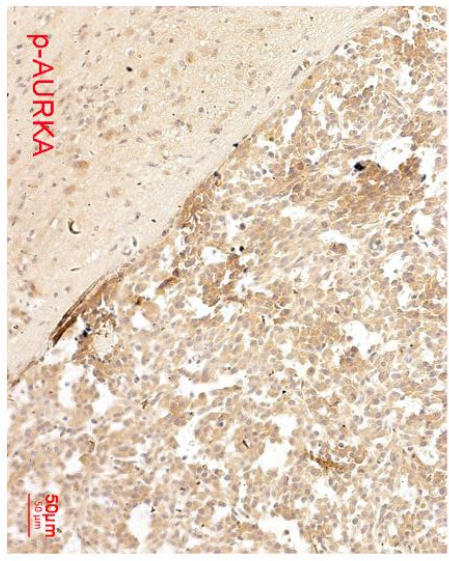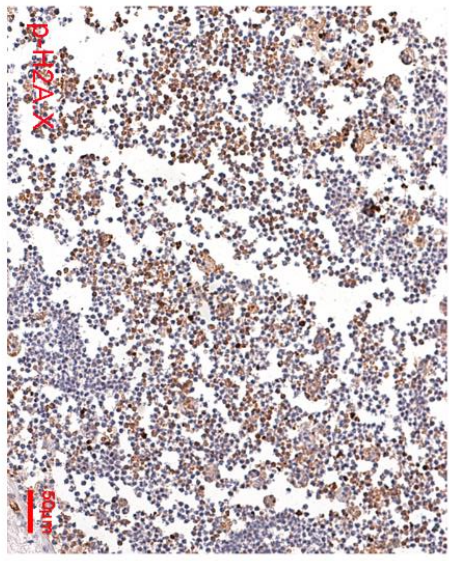

MLN8237

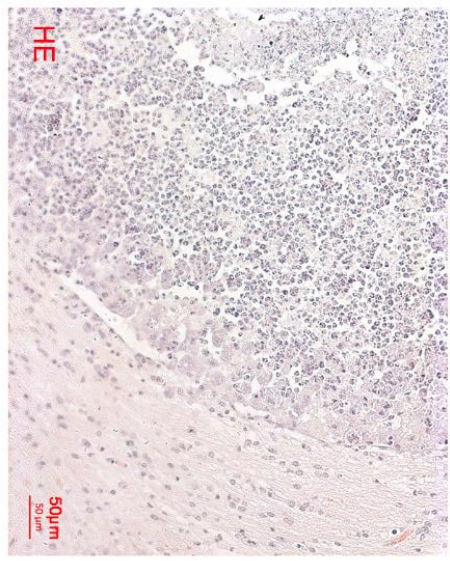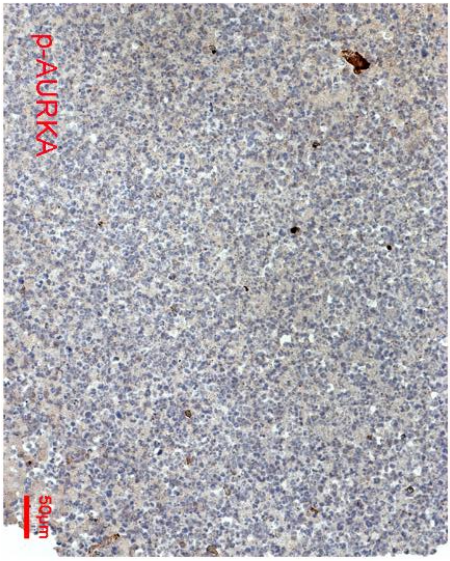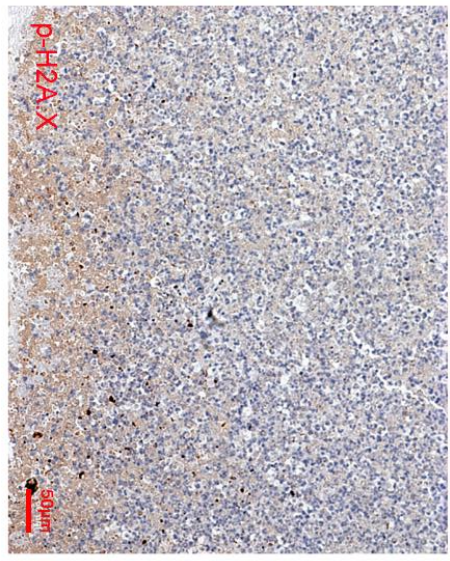

**Fig. S19. Reduced expression of p-AURKA and p-H2A.X in CDC20-M high PDX model following MLN8237 treatment.**

Representative images of HE staining and immunohistochemical staining of p-AURKA and p-H2A.X in xenograft sections from mice treated with vehicle or MLN8237. Results are representatives of two independent experiments, with three xenografts in each group.

**Table S1. Characteristics of the datasets used for the development and characterization of CDC20-M signature-based identification of GI in adult diffuse gliomas.**

| Dataset                | Country | Platform       | Samples                                                                                                                |
|------------------------|---------|----------------|------------------------------------------------------------------------------------------------------------------------|
| Rembrandt              | America | HG-U133Plus2.0 | 521 glioma samples (GBM 228, Astrocytoma 148, Oligodendroglioma 67, Mixed 11, unknown 67), 21 epileptic samples        |
| GSE16011               | Holland | HG-U133Plus2.0 | 238 glioma samples (GBM 136, Astrocytoma 28, Oligodendroglioma 47, Oligoastrocytoma 27), 8 normal brain tissue samples |
| GSE4290                | America | HG-U133Plus2.0 | 157 glioma samples (GBM 81, Astrocytoma 26, Oligodendroglioma 50), epileptic samples                                   |
| TCGA training cohort   | America | mRNA-seq       | 381 glioma samples (GBM 160, Astrocytoma 69, Oligodendroglioma 91, Oligoastrocytoma 60, unknown 1)                     |
|                        |         | SNP6.0         | 376 glioma samples (GBM 156, Astrocytoma 69, Oligodendroglioma 91, Oligoastrocytoma 60)                                |
|                        |         | Exome-seq      | 371 glioma samples (GBM 154, Astrocytoma 66, Oligodendroglioma 90, Oligoastrocytoma 60, unknown 1)                     |
| TCGA validation cohort | America | mRNA-seq       | 301 glioma samples (Astrocytoma 100, Oligodendroglioma 82, Oligoastrocytoma 54, unknown 65)                            |
|                        |         | SNP6.0         | 294 glioma samples (Astrocytoma 99, Oligodendroglioma 81, Oligoastrocytoma 54, unknown 60)                             |
|                        |         | Exome-seq      | 293 glioma samples (Astrocytoma 99, Oligodendroglioma 81, Oligoastrocytoma 54, unknown 59)                             |
| CGGA                   | China   | mRNA-seq       | 319 glioma samples (GBM 140, Astrocytoma 67, Oligodendroglioma 40, Oligoastrocytoma 72)                                |

The platforms, countries of origin, and sample composition of six glioma datasets used in our study are summarized.



**Table S2. Members of CDC20-M listed according to the tightness of their co-expression to CDC20. The genes are listed in descending order according to their PCC to CDC20 expression.**

CDC20-M was identified as the top 185 probe sets (containing 139 genes) most correlated to CDC20 in GSE4290. Members shared between CDC20-M and CIN70 are marked in red. The shared members of the 20 genes most co-expressed with CDC20 in GSE4290, GSE16011 and Rembrandt datasets are marked in yellow. Gene functions are categorized according to DAVID bioinformatics resources.

| Gene Symbol | PCC with CDC20 (%) | Chromosome Location | Regulators of DNA repair and damage checkpoints | Regulators of cell cycle, centrosome function, spindle organization and microtubule-based movement |
|-------------|--------------------|---------------------|-------------------------------------------------|----------------------------------------------------------------------------------------------------|
| CDC20       | 100                | 1p34.1              |                                                 | ✓                                                                                                  |
| TYMS        | 86.28              | 18p11.32            | ✓                                               |                                                                                                    |
| NCAPH       | 84.86              | 2q11.2              |                                                 | ✓                                                                                                  |
| TACC3       | 84.69              | 4p16.3              |                                                 | ✓                                                                                                  |
| KIF2C       | 84.4               | 1p34.1              |                                                 | ✓                                                                                                  |
| NUF2        | 84.34              | 1q23.3              |                                                 | ✓                                                                                                  |
| KIAA0101    | 84.21              | 15q22.31            | ✓                                               |                                                                                                    |
| CENPF       | 83.8               | 1q41                |                                                 | ✓                                                                                                  |
| FOXM1       | 83.77              | 12p13               | ✓                                               | ✓                                                                                                  |
| AURKA       | 83.69              | 20q13               |                                                 | ✓                                                                                                  |
| SMC4        | 83.42              | 3q26.1              |                                                 | ✓                                                                                                  |
| CCNB2       | 83.37              | 15q22.2             |                                                 | ✓                                                                                                  |
| PRC1        | 83                 | 15q26.1             |                                                 | ✓                                                                                                  |
| SHCBP1      | 82.83              | 16q11.2             |                                                 | ✓                                                                                                  |
| RRM2        | 82.71              | 2p25-p24            | ✓                                               |                                                                                                    |
| CCNB1       | 82.7               | 5q12                |                                                 | ✓                                                                                                  |
| CDCA3       | 82.61              | 12p13               |                                                 | ✓                                                                                                  |
| NUSAP1      | 82.53              | 15q15.1             |                                                 | ✓                                                                                                  |
| PTTG1       | 82.27              | 5q35.1              | ✓                                               | ✓                                                                                                  |
| BIRC5       | 82.2               | 17q25               |                                                 | ✓                                                                                                  |
| ASPM        | 82.15              | 1q31                |                                                 | ✓                                                                                                  |
| TPX2        | 82.13              | 20q11.2             |                                                 | ✓                                                                                                  |
| BUB1B       | 82.1               | 15q15               |                                                 | ✓                                                                                                  |
| MLF1IP      | 82.04              | 4q35.1              |                                                 | ✓                                                                                                  |
| CCNA2       | 81.99              | 4q27                |                                                 | ✓                                                                                                  |
| UBE2C       | 81.92              | 20q13.12            |                                                 | ✓                                                                                                  |
| GIN51       | 81.58              | 20p11.21            | ✓                                               |                                                                                                    |
| TIMELESS    | 81.5               | 12q13.3             | ✓                                               | ✓                                                                                                  |
| FANCI       | 81.46              | 15q26.1             | ✓                                               | ✓                                                                                                  |
| PCNA        | 81.36              | 20pter-p12          | ✓                                               |                                                                                                    |
| ECT2        | 81.12              | 3q26.1-q26.2        |                                                 | ✓                                                                                                  |

**Table S2 continued.**

| <b>Gene Symbol</b> | <b>PCC with CDC20 (%)</b> | <b>Chromosome Location</b> | <b>Regulators of DNA repair and damage checkpoints</b> | <b>Regulators of cell cycle, centrosome function, spindle organization and microtubule-based movement</b> |
|--------------------|---------------------------|----------------------------|--------------------------------------------------------|-----------------------------------------------------------------------------------------------------------|
| CENPE              | 80.84                     | 4q24-q25                   |                                                        | ✓                                                                                                         |
| KIF20A             | 80.73                     | 5q31                       |                                                        | ✓                                                                                                         |
| KIF14              | 80.7                      | 1q32.1                     |                                                        | ✓                                                                                                         |
| GAS2L3             | 80.21                     | 12q23.1                    |                                                        | ✓                                                                                                         |
| CENPA              | 80.21                     | 2p23.3                     |                                                        | ✓                                                                                                         |
| CDK1               | 80.17                     | 10q21.1                    | ✓                                                      | ✓                                                                                                         |
| CHEK1              | 80.01                     | 11q24.2                    | ✓                                                      | ✓                                                                                                         |
| CDCA8              | 79.99                     | 1p34.3                     |                                                        | ✓                                                                                                         |
| TTK                | 79.73                     | 6q13-q21                   |                                                        | ✓                                                                                                         |
| CDK2               | 79.56                     | 12q13                      | ✓                                                      | ✓                                                                                                         |
| E2F7               | 79.02                     | 12q21.2                    | ✓                                                      | ✓                                                                                                         |
| NCAPG              | 78.93                     | 4p15.33                    |                                                        | ✓                                                                                                         |
| CKS2               | 78.81                     | 9q22                       |                                                        | ✓                                                                                                         |
| HMGB2              | 78.58                     | 4q31                       |                                                        | ✓                                                                                                         |
| LRR1               | 78.34                     | 14q21.3                    |                                                        |                                                                                                           |
| DTL                | 78.21                     | 1q32                       | ✓                                                      | ✓                                                                                                         |
| HMMR               | 78.19                     | 5q33.2-qter                |                                                        | ✓                                                                                                         |
| SGOL2              | 77.98                     | 2q33.1                     |                                                        | ✓                                                                                                         |
| MAD2L1             | 77.97                     | 4q27                       |                                                        | ✓                                                                                                         |
| HJURP              | 77.89                     | 2q37.1                     |                                                        | ✓                                                                                                         |
| BUB1               | 77.83                     | 2q14                       |                                                        | ✓                                                                                                         |
| MCM2               | 77.82                     | 3q21                       | ✓                                                      | ✓                                                                                                         |
| PBK                | 77.8                      | 8p21.2                     |                                                        | ✓                                                                                                         |
| ESPL1              | 77.77                     | 12q                        |                                                        | ✓                                                                                                         |
| STIL               | 77.64                     | 1p32                       |                                                        | ✓                                                                                                         |
| TRIP13             | 77.57                     | 5p15.33                    |                                                        | ✓                                                                                                         |
| MELK               | 77.56                     | 9p13.2                     |                                                        | ✓                                                                                                         |
| NEK2               | 77.47                     | 1q32.2-q41                 |                                                        | ✓                                                                                                         |
| RNASEH2A           | 77.25                     | 19p13.2                    | ✓                                                      |                                                                                                           |
| MKI67              | 77.25                     | 10q26.2                    |                                                        | ✓                                                                                                         |
| DLGAP5             | 77.18                     | 14q22.3                    |                                                        | ✓                                                                                                         |
| CENPK              | 76.45                     | 5q12.3                     |                                                        | ✓                                                                                                         |
| CDCA7L             | 76.37                     | 7p15.3                     |                                                        | ✓                                                                                                         |
| MCM6               | 76.36                     | 2q21                       | ✓                                                      | ✓                                                                                                         |
| CKAP2L             | 76.29                     | 2q13                       |                                                        | ✓                                                                                                         |
| TK1                | 76.24                     | 17q23.2-q25.3              |                                                        | ✓                                                                                                         |
| MCM8               | 76.22                     | 20p12.3                    | ✓                                                      | ✓                                                                                                         |
| KIF11              | 76.07                     | 10q24.1                    |                                                        | ✓                                                                                                         |

**Table S2 continued.**

| <b>Gene Symbol</b> | <b>PCC with CDC20 (%)</b> | <b>Chromosome Location</b> | <b>Regulators of DNA repair and damage checkpoints</b> | <b>Regulators of cell cycle, centrosome function, spindle organization and microtubule-based movement</b> |
|--------------------|---------------------------|----------------------------|--------------------------------------------------------|-----------------------------------------------------------------------------------------------------------|
| CASC5              | 76.03                     | 15q14                      |                                                        | ✓                                                                                                         |
| GTSE1              | 75.96                     | 22q13.2-q13.3              |                                                        | ✓                                                                                                         |
| DEPDC1             | 75.96                     | 1p31.2                     |                                                        |                                                                                                           |
| <b>CEP55</b>       | 75.62                     | 10q23.33                   |                                                        | ✓                                                                                                         |
| DEPDC1B            | 75.58                     | 5q12.1                     |                                                        | ✓                                                                                                         |
| RBBP8              | 75.58                     | 18q11.2                    | ✓                                                      | ✓                                                                                                         |
| RACGAP1            | 75.46                     | 12q13.12                   |                                                        | ✓                                                                                                         |
| FAM64A             | 75.19                     | 17p13.2                    |                                                        | ✓                                                                                                         |
| SPAG5              | 75.14                     | 17q11.2                    |                                                        | ✓                                                                                                         |
| <b>ZWINT</b>       | 75.01                     | 10q21-q22                  |                                                        | ✓                                                                                                         |
| KPNA2              | 74.84                     | 17q24.2                    |                                                        |                                                                                                           |
| LMNB1              | 74.61                     | 5q23.2                     |                                                        | ✓                                                                                                         |
| <b>NCAPG2</b>      | 74.56                     | 7q36.3                     |                                                        | ✓                                                                                                         |
| MCM3               | 74.46                     | 6p12                       | ✓                                                      | ✓                                                                                                         |
| <b>CDC6</b>        | 74.44                     | 17q21.3                    | ✓                                                      | ✓                                                                                                         |
| <b>TOP2A</b>       | 74.39                     | 17q21-q22                  | ✓                                                      | ✓                                                                                                         |
| RFC2               | 74.13                     | 7q11.23                    | ✓                                                      | ✓                                                                                                         |
| GINS2              | 74.09                     | 16q24.1                    | ✓                                                      |                                                                                                           |
| <b>CDC45</b>       | 73.97                     | 22q11.21                   | ✓                                                      | ✓                                                                                                         |
| <b>ASF1B</b>       | 73.89                     | 19p13.12                   | ✓                                                      | ✓                                                                                                         |
| POLE2              | 73.85                     | 14q21-q22                  | ✓                                                      |                                                                                                           |
| GJC1               | 73.75                     | 17q21.31                   |                                                        |                                                                                                           |
| MYBL2              | 73.73                     | 20q13.1                    |                                                        | ✓                                                                                                         |
| DBF4               | 73.62                     | 7q21.3                     | ✓                                                      | ✓                                                                                                         |
| KIF15              | 73.61                     | 3p21.31                    |                                                        | ✓                                                                                                         |
| UBE2S              | 73.32                     | 19q13.43                   |                                                        | ✓                                                                                                         |
| SPC24              | 73.16                     | 19p13.2                    |                                                        | ✓                                                                                                         |
| NDC80              | 73.02                     | 18p11.32                   |                                                        | ✓                                                                                                         |
| EME1               | 72.99                     | 17q21.33                   | ✓                                                      |                                                                                                           |
| IGF2BP3            | 72.97                     | 7p11                       |                                                        |                                                                                                           |
| DNMT1              | 72.96                     | 19p13.2                    | ✓                                                      |                                                                                                           |
| KIFC1              | 72.91                     | 6p21.3                     |                                                        | ✓                                                                                                         |
| CASP2              | 72.88                     | 7q34-q35                   |                                                        |                                                                                                           |
| FBXO5              | 72.87                     | 6q25.2                     | ✓                                                      | ✓                                                                                                         |
| MND1               | 72.82                     | 4q31.3                     | ✓                                                      |                                                                                                           |
| <b>KIF4A</b>       | 72.74                     | Xq13.1                     |                                                        | ✓                                                                                                         |
| CDKN2C             | 72.69                     | 1p32                       | ✓                                                      | ✓                                                                                                         |
| C11orf82           | 72.55                     | 11q14.1                    |                                                        | ✓                                                                                                         |

**Table S2 continued.**

| <b>Gene Symbol</b> | <b>PCC with CDC20 (%)</b> | <b>Chromosome Location</b> | <b>Regulators of DNA repair and damage checkpoints</b> | <b>Regulators of cell cycle, centrosome function, spindle organization and microtubule-based movement</b> |
|--------------------|---------------------------|----------------------------|--------------------------------------------------------|-----------------------------------------------------------------------------------------------------------|
| DTYMK              | 72.29                     | 2q37.3                     |                                                        | ✓                                                                                                         |
| DSN1               | 72.2                      | 20q11.23                   |                                                        | ✓                                                                                                         |
| <b>RFC4</b>        | 72.16                     | 3q27                       | ✓                                                      | ✓                                                                                                         |
| NRM                | 72.12                     | 6p21.33                    |                                                        |                                                                                                           |
| DDX39A             | 71.86                     | 19p13.12                   |                                                        | ✓                                                                                                         |
| PDIA4              | 71.67                     | 7q35                       |                                                        |                                                                                                           |
| ZNF850             | 71.63                     | 19q13.12                   |                                                        |                                                                                                           |
| <b>AURKB</b>       | 71.6                      | 17p13.1                    |                                                        | ✓                                                                                                         |
| ZNF765             | 71.58                     | 19q13.42                   |                                                        |                                                                                                           |
| PARPBP             | 71.56                     | 12q23.2                    | ✓                                                      | ✓                                                                                                         |
| CDKN3              | 71.41                     | 14q22                      | ✓                                                      | ✓                                                                                                         |
| CDCA7              | 71.36                     | 2q31                       |                                                        | ✓                                                                                                         |
| BUD31              | 71.27                     | 7q22.1                     |                                                        |                                                                                                           |
| KNTC1              | 71.24                     | 12q24.31                   |                                                        | ✓                                                                                                         |
| USP1               | 71.18                     | 1p31.3                     | ✓                                                      |                                                                                                           |
| FANCD2             | 71.07                     | 3p26                       | ✓                                                      | ✓                                                                                                         |
| CDCA2              | 71.02                     | 8p21.2                     |                                                        | ✓                                                                                                         |
| SNRPB              | 70.96                     | 20p13                      |                                                        |                                                                                                           |
| TMEM48             | 70.92                     | 1p32.3                     |                                                        |                                                                                                           |
| LMNB2              | 70.75                     | 19p13.3                    | ✓                                                      |                                                                                                           |
| PTBP1              | 70.59                     | 19p13.3                    |                                                        |                                                                                                           |
| KIF23              | 70.56                     | 15q23                      |                                                        | ✓                                                                                                         |
| CDC25A             | 70.53                     | 3p21                       | ✓                                                      | ✓                                                                                                         |
| TCF3               | 70.38                     | 19p13.3                    | ✓                                                      |                                                                                                           |
| BRCA1              | 70.32                     | 17q21                      | ✓                                                      | ✓                                                                                                         |
| GPX7               | 70.26                     | 1p32                       | ✓                                                      |                                                                                                           |
| RAE1               | 70.22                     | 20q13.31                   |                                                        | ✓                                                                                                         |
| GTF2IRD2           | 70.2                      | 7q11.23                    |                                                        |                                                                                                           |
| RFC3               | 70.18                     | 13q13.2                    | ✓                                                      | ✓                                                                                                         |
| CENPW              | 70.08                     | 6q22.32                    |                                                        | ✓                                                                                                         |
| POC1A              | 70.07                     | 3p21.2                     |                                                        | ✓                                                                                                         |

**Table S3. The top 120 genes most correlated to CREBRF expression in glioma transcriptome dataset GSE4290.**

The genes are listed in descending order according to their PCC with CREBRF expression.

| Gene Symbol | PCC with CREBRF (%) | Chromosome Location |
|-------------|---------------------|---------------------|
| CREBRF      | 100.00              | 5q35.1              |
| IGIP        | 81.27               | 5q31                |
| CBX7        | 80.66               | 22q13.1             |
| MXI1        | 79.74               | 10q24-q25           |
| ZBTB44      | 78.53               | 11q24.3             |
| GTF2H5      | 78.03               | 6q25.3              |
| DCUN1D5     | 77.86               | 11q22.3             |
| ADRBK2      | 77.77               | 22q12.1             |
| HLF         | 77.33               | 17q22               |
| CHIC1       | 77.31               | Xq13.2              |
| SEC62       | 77.08               | 3q26.2              |
| RPS6KA5     | 76.42               | 14q31-q32.1         |
| NEBL        | 76.39               | 10p12               |
| TOM1L2      | 76.16               | 17p11.2             |
| TEF         | 76.11               | 22q13.2             |
| JMY         | 76.02               | 5q14.1              |
| FAIM2       | 75.99               | 12q13               |
| KIAA0240    | 75.77               | 6p21.1              |
| REPS2       | 75.72               | Xp22.2              |
| LOC283588   | 75.49               | 14q32.11            |
| AKAP6       | 75.47               | 14q12               |
| ZRANB1      | 75.47               | 10q26.13            |
| YPEL3       | 75.45               | 16p11.2             |
| MAPK10      | 75.39               | 4q22.1-q23          |
| GRAMD1B     | 75.38               | 11q24.1             |
| SCAPER      | 75.29               | 15q24               |
| CPEB3       | 75.21               | 10q23.32            |
| AGXT2L1     | 75.12               | 4q25                |
| LOC283713   | 75.11               | 15q13.1             |
| ZNF540      | 75.05               | 19q13.12            |
| SEP8        | 75.02               | 5q31                |
| SCAMP1      | 74.75               | 5q14.1              |
| SGSM1       | 74.70               | 22q11.23            |
| CRYZL1      | 74.64               | 21q21.3             |
| KSR2        | 74.47               | 12q24.22-q24.23     |
| HDAC4       | 74.44               | 2q37.3              |
| PIAS1       | 74.41               | 15q                 |
| FSTL5       | 74.26               | 4q32.3              |

**Table S3 continued.**

| <b>Gene Symbol</b>    | <b>PCC with CREBRF (%)</b> | <b>Chromosome Location</b> |
|-----------------------|----------------------------|----------------------------|
| PPP1R12B              | 74.23                      | 1q32.1                     |
| UQCRB                 | 73.89                      | 8q22                       |
| PPM1A                 | 73.87                      | 14q23.1                    |
| KIAA0368              | 73.87                      | 9q31.3                     |
| FBXO9                 | 73.84                      | 6p12.3-p11.2               |
| PURA                  | 73.74                      | 5q31                       |
| FRY                   | 73.64                      | 13q13.1                    |
| PPM1L                 | 73.45                      | 3q26.1                     |
| PLEKHM3               | 73.35                      | 2q33.3                     |
| DNAJC12               | 73.27                      | 10q22.1                    |
| GTDC1                 | 73.27                      | 2q22.3                     |
| C7orf41               | 73.10                      | 7p14.3                     |
| SH3BGRL2              | 73.08                      | 6q14.1                     |
| GABARAPL3///GABARAPL1 | 73.02                      | 15q26.1///12p13.2          |
| SLK                   | 72.81                      | 10q24.33                   |
| RELN                  | 72.80                      | 7q22                       |
| IKZF5                 | 72.80                      | 10q26                      |
| PPP1R3E               | 72.65                      | 14q11.2                    |
| MYCBP2                | 72.65                      | 13q22                      |
| FAM190B               | 72.61                      | 10q23.1                    |
| FBXL20                | 72.53                      | 17q12                      |
| BZRAP1                | 72.53                      | 17q22-q23                  |
| NR1D2                 | 72.47                      | 3p24.2                     |
| NEGR1                 | 72.37                      | 1p31.1                     |
| HMGCLL1               | 72.35                      | 6p12.1                     |
| EZH1                  | 72.33                      | 17q21.1-q21.3              |
| ACADSB                | 72.30                      | 10q26.13                   |
| PCGF5                 | 72.19                      | 10q23.32                   |
| RPL37                 | 72.10                      | 5p13                       |
| PELI3                 | 72.10                      | 11q13.2                    |
| RAB11FIP2             | 72.10                      | 10q26.11                   |
| SPTAN1                | 72.03                      | 9q34.11                    |
| HERC1                 | 71.86                      | 15q22                      |
| ADD3                  | 71.85                      | 10q25.2                    |
| TUB                   | 71.77                      | 11p15.5                    |
| GABARAPL1             | 71.71                      | 12p13.2                    |
| KIAA1107              | 71.69                      | 1p22.1                     |
| NAP1L3                | 71.65                      | Xq21.3-q22                 |
| MLLT6                 | 71.61                      | 17q21                      |
| PLA2G6                | 71.57                      | 22q13.1                    |
| AVPI1                 | 71.52                      | 10q24.2                    |

**Table S3 continued.**

| <b>Gene Symbol</b> | <b>PCC with CREBRF (%)</b> | <b>Chromosome Location</b> |
|--------------------|----------------------------|----------------------------|
| TTBK2              | 71.51                      | 15q15.2                    |
| GARNL3             | 71.45                      | 9q33.3                     |
| MINOS1             | 71.41                      | 1p36.13                    |
| ANKRD46            | 71.36                      | 8q22.2                     |
| GABRG1             | 71.35                      | 4p12                       |
| SKP1               | 71.32                      | 5q31                       |
| FBRSL1             | 71.32                      | 12q24.33                   |
| OIP5-AS1           | 71.29                      | 15q15.1                    |
| CDS2               | 71.15                      | 20p13                      |
| TBRG1              | 71.12                      | 11q24.2                    |
| USP46              | 71.10                      | 4q12                       |
| LOC157562          | 71.07                      | 8q22.3                     |
| PAPOLG             | 70.94                      | 2p16.1                     |
| AKR1C1             | 70.87                      | 10p15-p14                  |
| ZMYND11            | 70.82                      | 10p14                      |
| ABLIM1             | 70.81                      | 10q25                      |
| YPEL4              | 70.77                      | 11q12.1                    |
| NALCN              | 70.70                      | 13q32.3                    |
| NAP1L2             | 70.70                      | Xq13                       |
| CRY2               | 70.65                      | 11p11.2                    |
| SERP2              | 70.65                      | 13q14.11                   |
| RUNDC3A            | 70.62                      | 17q21.31                   |
| NTRK2              | 70.62                      | 9q22.1                     |
| SLC12A6            | 70.60                      | 15q13                      |
| ZBTB4              | 70.46                      | 17p13.1                    |
| ADARB2             | 70.44                      | 10p15.3                    |
| CAB39L             | 70.37                      | 13q14.2                    |
| MKX                | 70.36                      | 10p12.1                    |
| ATP6V1G2           | 70.33                      | 6p21.3                     |
| PPP1R3F            | 70.32                      | Xp11.23                    |
| POU6F1             | 70.32                      | 12q13.13                   |
| KIAA1377           | 70.31                      | 11q22.1                    |
| VPS13D             | 70.30                      | 1p36.22                    |
| EIF1               | 70.26                      | 17q21.2                    |
| RABGGTB            | 70.19                      | 1p31                       |
| NCAM1              | 70.18                      | 11q23.1                    |
| NCOA2              | 70.15                      | 8q13.3                     |
| GABBR1             | 70.12                      | 6p21.31                    |
| MAGEE1             | 70.12                      | Xq13.3                     |
| CCDC85A            | 70.05                      | 2p16.1                     |
| ARHGAP32           | 70.04                      | 11q24.3                    |

**Table S4. Results of multivariate Cox regression analysis for CIN70 score, age at the diagnosis, IDH1 mutation, 1p19q co-deletion, MKI67 score (the log2 RNA expression of Ki-67) in four large glioma datasets. CIN70 score was prognostic in the CGGA and REMBRANDT cohorts, but not in the other two cohorts.**

| Dataset                  | Variate           | P value | Hazard ratio | 95% CI for Hazard ratio |       | Dataset                       | Variate           | P value | Hazard ratio | 95% CI for Hazard ratio |       |
|--------------------------|-------------------|---------|--------------|-------------------------|-------|-------------------------------|-------------------|---------|--------------|-------------------------|-------|
|                          |                   |         |              | Lower                   | Upper |                               |                   |         |              | Lower                   | Upper |
| <b>TCGA</b><br>(n = 363) | CIN70 score       | .078    | 1.367        | .965                    | 1.937 | <b>GSE16011</b><br>(n = 235)  | CIN70 score       | .202    | 1.579        | .782                    | 3.186 |
|                          | age               | .000    | 1.057        | 1.042                   | 1.072 |                               | age               | .000    | 1.026        | 1.014                   | 1.039 |
|                          | IDH1 mutation     | .000    | .336         | .196                    | .576  |                               | IDH1 mutation     | .152    | .766         | .531                    | 1.103 |
|                          | 1p19q co-deletion | .225    | .626         | .293                    | 1.335 |                               | 1p19q co-deletion | .000    | .304         | .184                    | .503  |
|                          | MKI67 score       | .531    | .948         | .804                    | 1.119 |                               | KPS               | .000    | .970         | .960                    | .980  |
| <b>CGGA</b><br>(n = 304) | CIN70 score       | .000    | 2.375        | 1.496                   | 3.770 | <b>Rembrandt</b><br>(n = 403) | MKI67 score       | .625    | .901         | .594                    | 1.367 |
|                          | age               | .161    | 1.012        | .995                    | 1.028 |                               | CIN70 score       | .000    | 2.920        | 1.676                   | 5.085 |
|                          | IDH1 mutation     | .000    | .432         | .280                    | .665  |                               | age               | .000    | 1.280        | 1.216                   | 1.348 |
|                          | 1p19q co-deletion | .001    | .280         | .136                    | .580  |                               | 1p19q co-deletion | .015    | .572         | .364                    | .897  |
|                          | MKI67 score       | .656    | .939         | .712                    | 1.239 |                               | MKI67 score       | .020    | .589         | .378                    | .919  |



**Table S5. Copy number and mutation status of core components in the TP53 pathway based on SNP6.0 and WES data of CDC20-M high glioma samples in TCGA training cohort.**

| Sample       | TP53         | CDKN2A               | MDM2           | MDM4                | TP53 pathway changes |
|--------------|--------------|----------------------|----------------|---------------------|----------------------|
| TCGA-06-5416 | mutation     | CN Gain+mutation     | mutation       | mutation            | 4                    |
| TCGA-06-2569 | LOH+mutation |                      | CN Gain        | CN Gain             | 3                    |
| TCGA-26-5136 | mutation     | CN Gain              | CN Loss        |                     | 3                    |
| TCGA-14-1825 | 2 mutations  | Homozygous Copy Loss |                |                     | 2                    |
| TCGA-19-1390 | 2 mutations  | Homozygous Copy Loss |                |                     | 2                    |
| TCGA-02-2483 | LOH+mutation | CN Loss              |                |                     | 2                    |
| TCGA-E1-5304 | LOH+mutation | CN Loss              |                |                     | 2                    |
| TCGA-06-2567 | mutation     | CN Loss              |                |                     | 2                    |
| TCGA-14-0817 | mutation     | CN Loss              |                |                     | 2                    |
| TCGA-19-4065 | mutation     | CN Loss              |                |                     | 2                    |
| TCGA-28-1753 | mutation     | CN Loss              |                |                     | 2                    |
| TCGA-28-5215 | mutation     | CN Loss              |                |                     | 2                    |
| TCGA-06-0744 | mutation     | Homozygous Copy Loss |                |                     | 2                    |
| TCGA-76-4925 | mutation     | Homozygous Copy Loss |                |                     | 2                    |
| TCGA-06-0129 | mutation     |                      |                | mutation            | 2                    |
| TCGA-14-0871 | mutation     |                      |                | CN Gain             | 2                    |
| TCGA-28-5218 |              | CN Loss              |                | CN Gain             | 2                    |
| TCGA-32-4213 |              | CN Loss              |                | High Copy Gain, LOH | 2                    |
| TCGA-DU-6403 |              | CN Loss              |                | High Copy Gain      | 2                    |
| TCGA-FG-6692 |              | CN Loss              |                | CN Gain             | 2                    |
| TCGA-06-0187 |              | Homozygous Copy Loss | High Copy Gain |                     | 2                    |
| TCGA-12-0821 |              | Homozygous Copy Loss |                | High Copy Gain, LOH | 2                    |
| TCGA-14-0787 |              | Homozygous Copy Loss |                | CN Gain             | 2                    |
| TCGA-15-0742 |              | Homozygous Copy Loss |                | CN Gain             | 2                    |
| TCGA-76-4932 |              | Homozygous Copy Loss |                | CN Gain             | 2                    |
| TCGA-HT-8011 |              | Homozygous Copy Loss |                | High Copy Gain      | 2                    |

**Table S5 continued.**

| Sample       | TP53             | CDKN2A               | MDM2 | MDM4 | TP53 pathway changes |
|--------------|------------------|----------------------|------|------|----------------------|
| TCGA-02-2485 | 2 mutations      |                      |      |      | 1                    |
| TCGA-06-2559 | 2 mutations      |                      |      |      | 1                    |
| TCGA-41-5651 | CN Loss          |                      |      |      | 1                    |
| TCGA-26-5133 | CN Loss+mutation |                      |      |      | 1                    |
| TCGA-06-0130 | mutation         |                      |      |      | 1                    |
| TCGA-06-0644 | mutation         |                      |      |      | 1                    |
| TCGA-06-5858 | mutation         |                      |      |      | 1                    |
| TCGA-12-0619 | mutation         |                      |      |      | 1                    |
| TCGA-14-1034 | mutation         |                      |      |      | 1                    |
| TCGA-19-1787 | mutation         |                      |      |      | 1                    |
| TCGA-28-2509 | mutation         |                      |      |      | 1                    |
| TCGA-32-2616 | mutation         |                      |      |      | 1                    |
| TCGA-06-0745 |                  | CN Loss              |      |      | 1                    |
| TCGA-06-5408 |                  | CN Loss              |      |      | 1                    |
| TCGA-06-5413 |                  | CN Loss              |      |      | 1                    |
| TCGA-06-5414 |                  | CN Loss              |      |      | 1                    |
| TCGA-12-5295 |                  | CN Loss              |      |      | 1                    |
| TCGA-27-1831 |                  | CN Loss              |      |      | 1                    |
| TCGA-27-1837 |                  | CN Loss              |      |      | 1                    |
| TCGA-27-2524 |                  | CN Loss              |      |      | 1                    |
| TCGA-27-2528 |                  | CN Loss              |      |      | 1                    |
| TCGA-28-5204 |                  | CN Loss              |      |      | 1                    |
| TCGA-28-5209 |                  | CN Loss              |      |      | 1                    |
| TCGA-76-4928 |                  | CN Loss              |      |      | 1                    |
| TCGA-DU-6406 |                  | CN Loss              |      |      | 1                    |
| TCGA-06-0125 |                  | Homozygous Copy Loss |      |      | 1                    |
| TCGA-06-0211 |                  | Homozygous Copy Loss |      |      | 1                    |
| TCGA-12-3650 |                  | Homozygous Copy Loss |      |      | 1                    |
| TCGA-12-3652 |                  | Homozygous Copy Loss |      |      | 1                    |
| TCGA-12-5299 |                  | Homozygous Copy Loss |      |      | 1                    |
| TCGA-26-5134 |                  | Homozygous Copy Loss |      |      | 1                    |
| TCGA-27-2523 |                  | Homozygous Copy Loss |      |      | 1                    |

**Table S5 continued.**

| Sample                 | TP53         | CDKN2A               | MDM2           | MDM4                | TP53 pathway changes |
|------------------------|--------------|----------------------|----------------|---------------------|----------------------|
| TCGA-28-5208           |              | Homozygous Copy Loss |                |                     | 1                    |
| TCGA-41-2572           |              | Homozygous Copy Loss |                |                     | 1                    |
| TCGA-76-4931           |              | Homozygous Copy Loss |                |                     | 1                    |
| TCGA-06-0157           |              |                      |                | High Copy Gain, LOH | 1                    |
| TCGA-06-0174           |              |                      | High Copy Gain |                     | 1                    |
| TCGA-06-0686           |              |                      | High Copy Gain |                     | 1                    |
| TCGA-06-5856           |              |                      | High Copy Gain |                     | 1                    |
| TCGA-12-3653           |              |                      |                | CN Gain             | 1                    |
| TCGA-19-2624           |              |                      | High Copy Gain |                     | 1                    |
| TCGA-26-5135           |              |                      | High Copy Gain |                     | 1                    |
| TCGA-06-2557           |              |                      |                |                     | 0                    |
| gene altered in all    | <b>40.6%</b> | <b>66.7%</b>         | <b>13.0%</b>   | <b>21.7%</b>        | <b>98.6%</b>         |
| pathway altered in all |              | <b>98.6%</b>         |                |                     |                      |

**Table S6. Copy number and mutation status of core components in the TP53 pathway based on SNP6.0 and WES data of CDC20-M intermediate glioma samples in TCGA training cohort.**

| Sample       | TP53         | CDKN2A                        | MDM2           | MDM4                | TP53 pathway changes |
|--------------|--------------|-------------------------------|----------------|---------------------|----------------------|
| TCGA-27-2521 | LOH+mutation | Homozygous Copy Loss          | LOH            |                     | 3                    |
| TCGA-06-0210 | mutation     | CN Loss                       |                | High Copy Gain, LOH | 3                    |
| TCGA-28-5207 | mutation     |                               | CN Gain        | High Copy Gain      | 3                    |
| TCGA-DU-7010 | mutation     | CN Gain                       |                | CN Gain             | 3                    |
| TCGA-12-1597 |              | CN Gain                       | CN Gain        | High Copy Gain      | 3                    |
| TCGA-19-2625 | 2 mutations  |                               |                | CN Gain             | 2                    |
| TCGA-DU-6392 | 3 mutations  | mutation                      |                |                     | 2                    |
| TCGA-CS-4943 | LOH+mutation | Homozygous Copy Loss+mutation |                |                     | 2                    |
| TCGA-16-0846 | mutation     |                               |                | CN Gain             | 2                    |
| TCGA-06-2558 | mutation     |                               | LOH            |                     | 2                    |
| TCGA-06-0743 | mutation     | Homozygous Copy Loss          |                |                     | 2                    |
| TCGA-06-2563 | mutation     | Homozygous Copy Loss          |                |                     | 2                    |
| TCGA-28-5216 | mutation     | Homozygous Copy Loss          |                |                     | 2                    |
| TCGA-27-1830 | mutation     | CN Loss                       |                |                     | 2                    |
| TCGA-32-1970 | mutation     | CN Loss                       |                |                     | 2                    |
| TCGA-FG-5963 | mutation     | CN Loss                       |                |                     | 2                    |
| TCGA-HT-7606 | mutation     | CN Loss                       |                |                     | 2                    |
| TCGA-06-0750 |              | CN Loss                       |                | High Copy Gain, LOH | 2                    |
| TCGA-06-5411 |              | CN Loss                       |                | High Copy Gain, LOH | 2                    |
| TCGA-28-5220 |              | Homozygous Copy Loss          |                | High Copy Gain      | 2                    |
| TCGA-19-2619 |              | Homozygous Copy Loss          |                | CN Gain             | 2                    |
| TCGA-06-1804 |              | CN Loss                       |                | CN Gain             | 2                    |
| TCGA-HT-8104 |              | CN Loss                       |                | CN Gain             | 2                    |
| TCGA-27-2526 |              | CN Loss                       | High Copy Gain |                     | 2                    |

**Table S6 continued.**

| Sample       | TP53             | CDKN2A                        | MDM2           | MDM4                | TP53 pathway changes |
|--------------|------------------|-------------------------------|----------------|---------------------|----------------------|
| TCGA-14-0790 |                  | Homozygous Copy Loss          | CN Gain        |                     | 2                    |
| TCGA-32-2615 |                  | CN Loss, Homozygous Copy Loss | CN Gain        |                     | 2                    |
| TCGA-06-2561 |                  | CN Loss                       | CN Gain        |                     | 2                    |
| TCGA-06-5415 |                  | CN Loss                       | CN Gain        |                     | 2                    |
| TCGA-14-1823 |                  | CN Loss                       | CN Gain        |                     | 2                    |
| TCGA-14-2554 |                  | CN Loss                       | CN Gain        |                     | 2                    |
| TCGA-06-5417 | 2 mutations      |                               |                |                     | 1                    |
| TCGA-76-4929 | 2 mutations      |                               |                |                     | 1                    |
| TCGA-DU-8165 | 2 mutations      |                               |                |                     | 1                    |
| TCGA-HT-7469 | 2 mutations      |                               |                |                     | 1                    |
| TCGA-27-1835 | CN Loss+mutation |                               |                |                     | 1                    |
| TCGA-32-2634 | LOH              |                               |                |                     | 1                    |
| TCGA-02-0055 | mutation         |                               |                |                     | 1                    |
| TCGA-06-0184 | mutation         |                               |                |                     | 1                    |
| TCGA-06-0190 | mutation         |                               |                |                     | 1                    |
| TCGA-06-0238 | mutation         |                               |                |                     | 1                    |
| TCGA-06-2570 | mutation         |                               |                |                     | 1                    |
| TCGA-12-0618 | mutation         |                               |                |                     | 1                    |
| TCGA-27-2519 | mutation         |                               |                |                     | 1                    |
| TCGA-41-3915 | mutation         |                               |                |                     | 1                    |
| TCGA-DH-5140 | mutation         |                               |                |                     | 1                    |
| TCGA-DU-7013 | mutation         |                               |                |                     | 1                    |
| TCGA-06-0747 |                  | Homozygous Copy Loss          |                |                     | 1                    |
| TCGA-32-2632 |                  |                               |                | High Copy Gain, LOH | 1                    |
| TCGA-06-0168 |                  |                               |                | CN Gain             | 1                    |
| TCGA-06-0138 |                  |                               | High Copy Gain |                     | 1                    |
| TCGA-19-0957 |                  |                               | High Copy Gain |                     | 1                    |
| TCGA-41-2571 |                  |                               | High Copy Gain |                     | 1                    |
| TCGA-19-5960 |                  |                               | CN Loss        |                     | 1                    |
| TCGA-06-2565 |                  | Homozygous Copy Loss          |                |                     | 1                    |
| TCGA-28-1747 |                  | Homozygous Copy Loss          |                |                     | 1                    |

**Table S6 continued.**

| Sample                 | TP53         | CDKN2A               | MDM2         | MDM4         | TP53 pathway changes |
|------------------------|--------------|----------------------|--------------|--------------|----------------------|
| TCGA-28-2514           |              | Homozygous Copy Loss |              |              | 1                    |
| TCGA-DU-5852           |              | Homozygous Copy Loss |              |              | 1                    |
| TCGA-32-2638           |              | CN Loss+mutation     |              |              | 1                    |
| TCGA-02-2486           |              | CN Loss              |              |              | 1                    |
| TCGA-06-0158           |              | CN Loss              |              |              | 1                    |
| TCGA-06-0219           |              | CN Loss              |              |              | 1                    |
| TCGA-06-0649           |              | CN Loss              |              |              | 1                    |
| TCGA-06-0878           |              | CN Loss              |              |              | 1                    |
| TCGA-06-2562           |              | CN Loss              |              |              | 1                    |
| TCGA-06-2564           |              | CN Loss              |              |              | 1                    |
| TCGA-06-5418           |              | CN Loss              |              |              | 1                    |
| TCGA-06-5859           |              | CN Loss              |              |              | 1                    |
| TCGA-14-0789           |              | CN Loss              |              |              | 1                    |
| TCGA-14-1402           |              | CN Loss              |              |              | 1                    |
| TCGA-14-1829           |              | CN Loss              |              |              | 1                    |
| TCGA-16-1045           |              | CN Loss              |              |              | 1                    |
| TCGA-19-2620           |              | CN Loss              |              |              | 1                    |
| TCGA-19-2629           |              | CN Loss              |              |              | 1                    |
| TCGA-26-5139           |              | CN Loss              |              |              | 1                    |
| TCGA-32-1982           |              | CN Loss              |              |              | 1                    |
| TCGA-32-5222           |              | CN Loss              |              |              | 1                    |
| TCGA-41-4097           |              | CN Loss              |              |              | 1                    |
| TCGA-76-4926           |              | CN Loss              |              |              | 1                    |
| TCGA-CS-6186           |              | CN Loss              |              |              | 1                    |
| TCGA-DU-5847           |              | CN Loss              |              |              | 1                    |
| TCGA-DU-6402           |              | CN Loss              |              |              | 1                    |
| TCGA-DU-6405           |              | CN Loss              |              |              | 1                    |
| TCGA-DU-7006           |              | CN Loss              |              |              | 1                    |
| TCGA-06-0178           |              | CN Gain              |              |              | 1                    |
| TCGA-02-0047           |              |                      |              |              | 0                    |
| TCGA-06-0141           |              |                      |              |              | 0                    |
| TCGA-06-5410           |              |                      |              |              | 0                    |
| TCGA-06-5412           |              |                      |              |              | 0                    |
| TCGA-08-0386           |              |                      |              |              | 0                    |
| TCGA-14-0781           |              |                      |              |              | 0                    |
| TCGA-19-1389           |              |                      |              |              | 0                    |
| TCGA-27-1832           |              |                      |              |              | 0                    |
| TCGA-28-2513           |              |                      |              |              | 0                    |
| TCGA-28-5213           |              |                      |              |              | 0                    |
| TCGA-DB-5274           |              |                      |              |              | 0                    |
| gene altered in all    | <b>33.7%</b> | <b>61.1%</b>         | <b>15.8%</b> | <b>14.7%</b> | <b>88.4%</b>         |
| pathway altered in all |              | <b>88.4%</b>         |              |              |                      |

**Table S7. Copy number and mutation status of core components in the TP53 pathway based on SNP6.0 and WES data of CREBRF-M intermediate glioma samples in TCGA training cohort.**

| Sample       | TP53                  | CDKN2A  | MDM2     | MDM4                | TP53 pathway changes |
|--------------|-----------------------|---------|----------|---------------------|----------------------|
| TCGA-HT-7475 | 2 mutations           | CN Loss |          | CN Gain             | 3                    |
| TCGA-IK-7675 | mutation              | CN Loss | CN Loss  |                     | 3                    |
| TCGA-DB-5281 | 2 mutations           | CN Loss |          |                     | 2                    |
| TCGA-DB-5277 | CN Gain, LOH+mutation | CN Loss |          |                     | 2                    |
| TCGA-E1-5305 | mutation              |         | CN Gain  |                     | 2                    |
| TCGA-06-0221 | mutation              | CN Loss |          |                     | 2                    |
| TCGA-DU-6407 | mutation              | CN Loss |          |                     | 2                    |
| TCGA-DU-7301 | mutation              | CN Loss |          |                     | 2                    |
| TCGA-FG-5965 | mutation              | CN Loss |          |                     | 2                    |
| TCGA-HT-7476 | mutation              | CN Loss |          |                     | 2                    |
| TCGA-CS-5395 |                       | CN Loss |          | High Copy Gain      | 2                    |
| TCGA-27-1834 |                       | CN Loss |          | High Copy Gain, LOH | 2                    |
| TCGA-DU-7292 |                       | CN Loss |          | High Copy Gain, LOH | 2                    |
| TCGA-FG-8185 |                       | CN Loss | mutation |                     | 2                    |
| TCGA-DH-5143 | 2 mutations           |         |          |                     | 1                    |
| TCGA-DU-7298 | 2 mutations           |         |          |                     | 1                    |
| TCGA-DU-7304 | 2 mutations           |         |          |                     | 1                    |
| TCGA-DU-8167 | 2 mutations           |         |          |                     | 1                    |
| TCGA-FG-6690 | 2 mutations           |         |          |                     | 1                    |
| TCGA-FG-8182 | 2 mutations           |         |          |                     | 1                    |
| TCGA-FG-8188 | 2 mutations           |         |          |                     | 1                    |
| TCGA-FN-7833 | 2 mutations           |         |          |                     | 1                    |
| TCGA-HT-7604 | 2 mutations           |         |          |                     | 1                    |
| TCGA-HT-7879 | 2 mutations           |         |          |                     | 1                    |
| TCGA-HT-8013 | 2 mutations           |         |          |                     | 1                    |
| TCGA-HT-8114 | 2 mutations           |         |          |                     | 1                    |
| TCGA-HT-8563 | 2 mutations           |         |          |                     | 1                    |
| TCGA-HT-8564 | 2 mutations           |         |          |                     | 1                    |
| TCGA-HW-8319 | 2 mutations           |         |          |                     | 1                    |
| TCGA-DB-5275 | LOH+mutation          |         |          |                     | 1                    |
| TCGA-CS-4942 | mutation              |         |          |                     | 1                    |
| TCGA-CS-5396 | mutation              |         |          |                     | 1                    |
| TCGA-CS-6665 | mutation              |         |          |                     | 1                    |
| TCGA-DB-5273 | mutation              |         |          |                     | 1                    |

**Table S7 continued.**

| Sample       | TP53     | CDKN2A  | MDM2                | MDM4           | TP53 pathway changes |
|--------------|----------|---------|---------------------|----------------|----------------------|
| TCGA-DH-5142 | mutation |         |                     |                | 1                    |
| TCGA-DU-5872 | mutation |         |                     |                | 1                    |
| TCGA-DU-6395 | mutation |         |                     |                | 1                    |
| TCGA-DU-6396 | mutation |         |                     |                | 1                    |
| TCGA-DU-6399 | mutation |         |                     |                | 1                    |
| TCGA-DU-6408 | mutation |         |                     |                | 1                    |
| TCGA-DU-6542 | mutation |         |                     |                | 1                    |
| TCGA-DU-7007 | mutation |         |                     |                | 1                    |
| TCGA-DU-7008 | mutation |         |                     |                | 1                    |
| TCGA-DU-7015 | mutation |         |                     |                | 1                    |
| TCGA-DU-8163 | mutation |         |                     |                | 1                    |
| TCGA-DU-8166 | mutation |         |                     |                | 1                    |
| TCGA-E1-5302 | mutation |         |                     |                | 1                    |
| TCGA-E1-5303 | mutation |         |                     |                | 1                    |
| TCGA-E1-5322 | mutation |         |                     |                | 1                    |
| TCGA-FG-6691 | mutation |         |                     |                | 1                    |
| TCGA-FG-7636 | mutation |         |                     |                | 1                    |
| TCGA-HT-7472 | mutation |         |                     |                | 1                    |
| TCGA-HT-7478 | mutation |         |                     |                | 1                    |
| TCGA-HT-7483 | mutation |         |                     |                | 1                    |
| TCGA-HT-7601 | mutation |         |                     |                | 1                    |
| TCGA-HT-7676 | mutation |         |                     |                | 1                    |
| TCGA-HT-7686 | mutation |         |                     |                | 1                    |
| TCGA-HT-7690 | mutation |         |                     |                | 1                    |
| TCGA-HT-7858 | mutation |         |                     |                | 1                    |
| TCGA-HT-7873 | mutation |         |                     |                | 1                    |
| TCGA-HT-8106 | mutation |         |                     |                | 1                    |
| TCGA-HT-8108 | mutation |         |                     |                | 1                    |
| TCGA-HT-8111 | mutation |         |                     |                | 1                    |
| TCGA-HW-8320 | mutation |         |                     |                | 1                    |
| TCGA-FG-6688 |          |         |                     | High Copy Gain | 1                    |
| TCGA-CS-5394 |          |         |                     | LOH            | 1                    |
| TCGA-CS-4941 |          |         | High Copy Gain, LOH |                | 1                    |
| TCGA-06-0171 |          | CN Loss |                     |                | 1                    |
| TCGA-06-0749 |          | CN Loss |                     |                | 1                    |
| TCGA-06-0882 |          | CN Loss |                     |                | 1                    |
| TCGA-15-1444 |          | CN Loss |                     |                | 1                    |
| TCGA-CS-5397 |          | CN Loss |                     |                | 1                    |



**Table S7 continued.**

| Sample                 | TP53         | CDKN2A       | MDM2        | MDM4        | TP53 pathway changes |
|------------------------|--------------|--------------|-------------|-------------|----------------------|
| TCGA-DU-5854           |              | CN Loss      |             |             | 1                    |
| TCGA-DU-7012           |              | CN Loss      |             |             | 1                    |
| TCGA-DU-8158           |              | CN Loss      |             |             | 1                    |
| TCGA-DU-8168           |              | CN Loss      |             |             | 1                    |
| TCGA-FG-5964           |              | CN Loss      |             |             | 1                    |
| TCGA-DU-6393           |              | LOH          |             |             | 1                    |
| TCGA-28-2510           |              |              |             |             | 0                    |
| TCGA-32-1980           |              |              |             |             | 0                    |
| TCGA-CS-5390           |              |              |             |             | 0                    |
| TCGA-CS-6666           |              |              |             |             | 0                    |
| TCGA-CS-6668           |              |              |             |             | 0                    |
| TCGA-DU-5870           |              |              |             |             | 0                    |
| TCGA-DU-5874           |              |              |             |             | 0                    |
| TCGA-DU-6394           |              |              |             |             | 0                    |
| TCGA-DU-6397           |              |              |             |             | 0                    |
| TCGA-DU-6404           |              |              |             |             | 0                    |
| TCGA-DU-6410           |              |              |             |             | 0                    |
| TCGA-DU-7009           |              |              |             |             | 0                    |
| TCGA-DU-7014           |              |              |             |             | 0                    |
| TCGA-DU-7018           |              |              |             |             | 0                    |
| TCGA-DU-7290           |              |              |             |             | 0                    |
| TCGA-DU-8161           |              |              |             |             | 0                    |
| TCGA-DU-8164           |              |              |             |             | 0                    |
| TCGA-E1-5318           |              |              |             |             | 0                    |
| TCGA-FG-7634           |              |              |             |             | 0                    |
| TCGA-FG-7637           |              |              |             |             | 0                    |
| TCGA-FG-7638           |              |              |             |             | 0                    |
| TCGA-HT-7467           |              |              |             |             | 0                    |
| TCGA-HT-7468           |              |              |             |             | 0                    |
| TCGA-HT-7471           |              |              |             |             | 0                    |
| TCGA-HT-7481           |              |              |             |             | 0                    |
| TCGA-HT-7482           |              |              |             |             | 0                    |
| TCGA-HT-7616           |              |              |             |             | 0                    |
| TCGA-HT-7677           |              |              |             |             | 0                    |
| TCGA-HT-7687           |              |              |             |             | 0                    |
| TCGA-HT-7692           |              |              |             |             | 0                    |
| TCGA-HW-8322           |              |              |             |             | 0                    |
| TCGA-IK-8125           |              |              |             |             | 0                    |
| gene altered in all    | <b>54.5%</b> | <b>21.8%</b> | <b>3.6%</b> | <b>5.5%</b> | <b>70.9%</b>         |
| pathway altered in all |              | <b>70.9%</b> |             |             |                      |

**Table S8. Copy number and mutation status of core components in the TP53 pathway based on SNP6.0 and WES data of CREBRF-M high glioma samples in TCGA training cohort.**

| Sample       | TP53                | CDKN2A  | MDM2 | MDM4     | TP53 pathway changes |
|--------------|---------------------|---------|------|----------|----------------------|
| TCGA-DU-5855 | mutation            | CN Loss |      | mutation | 3                    |
| TCGA-26-1442 | mutation            | CN Loss |      |          | 2                    |
| TCGA-DU-7019 | mutation            | CN Loss |      |          | 2                    |
| TCGA-HT-7474 | mutation            | CN Gain |      |          | 2                    |
| TCGA-HT-7688 | mutation            |         |      | CN Gain  | 2                    |
| TCGA-CS-6667 | 2 mutations         |         |      |          | 1                    |
| TCGA-DB-5270 | 2 mutations         |         |      |          | 1                    |
| TCGA-HT-7609 | 2 mutations         |         |      |          | 1                    |
| TCGA-HT-7610 | 2 mutations         |         |      |          | 1                    |
| TCGA-HT-7611 | 2 mutations         |         |      |          | 1                    |
| TCGA-HT-7602 | 3 mutations         |         |      |          | 1                    |
| TCGA-DU-6401 | CN<br>Loss+mutation |         |      |          | 1                    |
| TCGA-CS-4938 | mutation            |         |      |          | 1                    |
| TCGA-CS-5393 | mutation            |         |      |          | 1                    |
| TCGA-CS-6290 | mutation            |         |      |          | 1                    |
| TCGA-DB-5276 | mutation            |         |      |          | 1                    |
| TCGA-DB-5280 | mutation            |         |      |          | 1                    |
| TCGA-DU-5871 | mutation            |         |      |          | 1                    |
| TCGA-DU-7011 | mutation            |         |      |          | 1                    |
| TCGA-DU-7299 | mutation            |         |      |          | 1                    |
| TCGA-DU-7306 | mutation            |         |      |          | 1                    |
| TCGA-DU-7309 | mutation            |         |      |          | 1                    |
| TCGA-E1-5307 | mutation            |         |      |          | 1                    |
| TCGA-FG-6689 | mutation            |         |      |          | 1                    |
| TCGA-FG-8191 | mutation            |         |      |          | 1                    |
| TCGA-HT-7470 | mutation            |         |      |          | 1                    |
| TCGA-HT-7473 | mutation            |         |      |          | 1                    |
| TCGA-HT-7479 | mutation            |         |      |          | 1                    |
| TCGA-HT-7485 | mutation            |         |      |          | 1                    |
| TCGA-HT-7603 | mutation            |         |      |          | 1                    |
| TCGA-HT-7689 | mutation            |         |      |          | 1                    |
| TCGA-HT-7693 | mutation            |         |      |          | 1                    |
| TCGA-HT-7855 | mutation            |         |      |          | 1                    |
| TCGA-HT-7880 | mutation            |         |      |          | 1                    |
| TCGA-HT-7902 | mutation            |         |      |          | 1                    |
| TCGA-HT-8018 | mutation            |         |      |          | 1                    |
| TCGA-HT-8105 | mutation            |         |      |          | 1                    |
| TCGA-HW-7489 | mutation            |         |      |          | 1                    |

**Table S8 continued.**

| Sample       | TP53     | CDKN2A  | MDM2 | MDM4 | TP53 pathway changes |
|--------------|----------|---------|------|------|----------------------|
| TCGA-HW-7490 | mutation |         |      |      | 1                    |
| TCGA-HW-8321 | mutation |         |      |      | 1                    |
| TCGA-14-0736 |          | CN Loss |      |      | 1                    |
| TCGA-DH-5144 |          | LOH     |      |      | 1                    |
| TCGA-DU-7302 |          | CN Loss |      |      | 1                    |
| TCGA-EZ-7264 |          | CN Loss |      |      | 1                    |
| TCGA-06-0132 |          |         |      |      | 0                    |
| TCGA-CS-4944 |          |         |      |      | 0                    |
| TCGA-CS-6669 |          |         |      |      | 0                    |
| TCGA-CS-6670 |          |         |      |      | 0                    |
| TCGA-DB-5278 |          |         |      |      | 0                    |
| TCGA-DB-5279 |          |         |      |      | 0                    |
| TCGA-DH-5141 |          |         |      |      | 0                    |
| TCGA-DU-5849 |          |         |      |      | 0                    |
| TCGA-DU-5851 |          |         |      |      | 0                    |
| TCGA-DU-6400 |          |         |      |      | 0                    |
| TCGA-DU-7294 |          |         |      |      | 0                    |
| TCGA-DU-8162 |          |         |      |      | 0                    |
| TCGA-E1-5311 |          |         |      |      | 0                    |
| TCGA-E1-5319 |          |         |      |      | 0                    |
| TCGA-FG-5962 |          |         |      |      | 0                    |
| TCGA-FG-7641 |          |         |      |      | 0                    |
| TCGA-FG-7643 |          |         |      |      | 0                    |
| TCGA-FG-8181 |          |         |      |      | 0                    |
| TCGA-FG-8186 |          |         |      |      | 0                    |
| TCGA-FG-8187 |          |         |      |      | 0                    |
| TCGA-HT-7480 |          |         |      |      | 0                    |
| TCGA-HT-7605 |          |         |      |      | 0                    |
| TCGA-HT-7607 |          |         |      |      | 0                    |
| TCGA-HT-7608 |          |         |      |      | 0                    |
| TCGA-HT-7620 |          |         |      |      | 0                    |
| TCGA-HT-7680 |          |         |      |      | 0                    |
| TCGA-HT-7681 |          |         |      |      | 0                    |
| TCGA-HT-7684 |          |         |      |      | 0                    |
| TCGA-HT-7691 |          |         |      |      | 0                    |
| TCGA-HT-7694 |          |         |      |      | 0                    |
| TCGA-HT-7695 |          |         |      |      | 0                    |
| TCGA-HT-7854 |          |         |      |      | 0                    |
| TCGA-HT-7874 |          |         |      |      | 0                    |
| TCGA-HT-7875 |          |         |      |      | 0                    |
| TCGA-HT-7877 |          |         |      |      | 0                    |

**Table S8 continued.**

| <b>Sample</b>          | <b>TP53</b>  | <b>CDKN2A</b> | <b>MDM2</b> | <b>MDM4</b> | <b>TP53 pathway changes</b> |
|------------------------|--------------|---------------|-------------|-------------|-----------------------------|
| TCGA-HT-7884           |              |               |             |             | 0                           |
| TCGA-HT-8010           |              |               |             |             | 0                           |
| TCGA-HT-8113           |              |               |             |             | 0                           |
| TCGA-HT-8558           |              |               |             |             | 0                           |
| TCGA-HW-7486           |              |               |             |             | 0                           |
| TCGA-HW-7487           |              |               |             |             | 0                           |
| TCGA-HW-7491           |              |               |             |             | 0                           |
| TCGA-HW-7493           |              |               |             |             | 0                           |
| TCGA-HW-7495           |              |               |             |             | 0                           |
| gene altered in all    | <b>45.5%</b> | <b>9.1%</b>   | <b>0.0%</b> | <b>2.3%</b> | <b>50.0%</b>                |
| pathway altered in all |              | <b>50.0%</b>  |             |             |                             |

**Table S9. The patient information of each glioma cell line**

| <b>Cell line</b> | <b>Histology</b> | <b>Grade</b> | <b>Gender</b> | <b>Age</b> |
|------------------|------------------|--------------|---------------|------------|
| PDX              | GBM              | IV           | M             | 46         |
| N5               | GBM              | IV           | F             | 49         |
| N9               | GBM              | IV           | M             | 53         |
| N33              | GBM              | IV           | M             | 34         |
| N3               | AOA              | III          | M             | 31         |
| N8               | OA               | II           | M             | 47         |

GBM, glioblastoma multiforme; AOA, anaplastic oligoastrocytoma; OA, oligoastrocytoma; F, female; M, male.

**Table S10. Frequent CNA and mutation in CDC20-M members in gliomas with high or intermediate CDC20-M signature.**

| TCGA Samples<br>CDC20-M members status                    | CDC20-M high or<br>intermediate | CREBRF-M<br>intermediate | CREBRF-M high | P value            |
|-----------------------------------------------------------|---------------------------------|--------------------------|---------------|--------------------|
| Percentage of samples harboring CNA                       | 93.5% (159/170)                 | 77.5% (86/111)           | 39.4% (37/94) | <b>&lt; 0.0001</b> |
| Number of CNAs per changed sample<br>(mean $\pm$ SD)      | 18 $\pm$ 13                     | 9 $\pm$ 9                | 4 $\pm$ 5     | <b>&lt; 0.0001</b> |
| Percentage of samples harboring mutations                 | 24.7% (42/170)                  | 10.8% (12/111)           | 14.9% (14/94) | 0.0081             |
| Number of mutations per changed sample<br>(mean $\pm$ SD) | 1.7 $\pm$ 1.5                   | 1.3 $\pm$ 0.7            | 1.2 $\pm$ 0.4 | 0.3497             |

Copy number amplifications (CNA) and nonsynonymous mutations in the members of CDC20-M were analysed according to CDC20-M/CREBRF-M clustering in the TCGA training cohort. Chi-square test was used to compare the percentages of samples harboring CNA or mutations, and one-way ANOVA test was used to compare the number of CNAs or mutations per sample.

**Table S11. Summary of CNAs and mutations in the CDC20-M members in TCGA training cohort classified according to the CDC20-M/CREBRF-M clustering.**

| CDC20-M members | CDC20-M high or intermediate (170)   |                                 | CREBRF-M intermediate (111)          |                                 | CREBRF-M high (94)                   |                                 |
|-----------------|--------------------------------------|---------------------------------|--------------------------------------|---------------------------------|--------------------------------------|---------------------------------|
|                 | Number of samples with amplification | Number of samples with mutation | Number of samples with amplification | Number of samples with mutation | Number of samples with amplification | Number of samples with mutation |
| ASF1B           | 49                                   | 1                               | 8                                    |                                 | 2                                    |                                 |
| ASPM            | 21                                   | 5                               | 6                                    | 1                               | 1                                    | 1                               |
| AURKA           | 45                                   |                                 | 10                                   | 1                               | 2                                    |                                 |
| AURKB           | 2                                    |                                 | 1                                    |                                 | 0                                    |                                 |
| BIRC5           | 11                                   |                                 | 4                                    |                                 | 0                                    |                                 |
| BRCA1           | 6                                    | 4                               | 1                                    |                                 | 0                                    |                                 |
| BUB1            | 6                                    | 1                               | 0                                    | 1                               | 0                                    |                                 |
| BUB1B           | 2                                    |                                 | 0                                    |                                 | 1                                    |                                 |
| BUD31           | 126                                  |                                 | 36                                   |                                 | 10                                   |                                 |
| CASC5           | 0                                    | 1                               | 0                                    | 1                               | 0                                    | 1                               |
| CASP2           | 124                                  | 1                               | 40                                   |                                 | 12                                   | 1                               |
| CCNA2           | 1                                    |                                 | 0                                    |                                 | 2                                    |                                 |
| CCNB1           | 5                                    |                                 | 1                                    |                                 | 0                                    |                                 |
| CCNB2           | 3                                    |                                 | 2                                    |                                 | 1                                    |                                 |
| CDC20           | 15                                   |                                 | 4                                    |                                 | 0                                    |                                 |
| CDC25A          | 8                                    |                                 | 3                                    |                                 | 0                                    |                                 |
| CDC45           | 6                                    |                                 | 3                                    |                                 | 0                                    |                                 |
| CDC6            | 4                                    |                                 | 1                                    |                                 | 0                                    |                                 |
| CDCA2           | 8                                    |                                 | 10                                   |                                 | 1                                    |                                 |
| CDCA3           | 16                                   |                                 | 20                                   |                                 | 6                                    |                                 |
| CDCA7           | 7                                    |                                 | 0                                    |                                 | 0                                    |                                 |
| CDCA7L          | 119                                  | 1                               | 24                                   |                                 | 4                                    |                                 |
| CDCA8           | 16                                   |                                 | 4                                    |                                 | 0                                    |                                 |
| CDK1            | 0                                    |                                 | 1                                    |                                 | 0                                    |                                 |
| CDK2            | 13                                   |                                 | 2                                    |                                 | 0                                    |                                 |
| CDKN2C          | 15                                   | 4                               | 4                                    |                                 | 0                                    | 1                               |
| CDKN3           | 2                                    |                                 | 1                                    |                                 | 0                                    | 1                               |
| CENPA           | 7                                    | 1                               | 0                                    |                                 | 0                                    |                                 |
| CENPE           | 0                                    | 3                               | 1                                    |                                 | 0                                    |                                 |
| CENPF           | 19                                   | 3                               | 5                                    |                                 | 1                                    | 1                               |
| CENPK           | 4                                    | 1                               | 0                                    | 1                               | 0                                    |                                 |
| CENPN           | 2                                    |                                 | 1                                    |                                 | 0                                    |                                 |
| CENPU           | 2                                    |                                 | 0                                    |                                 | 0                                    |                                 |
| CENPW           | 1                                    |                                 | 1                                    |                                 | 0                                    |                                 |
| CEP55           | 0                                    |                                 | 0                                    |                                 | 0                                    |                                 |
| CHEK1           | 3                                    | 1                               | 16                                   |                                 | 10                                   |                                 |

**Table S11 continued.**

| CDC20-M members | CDC20-M high or intermediate (170)   |                                 | CREBRF-M intermediate (111)          |                                 | CREBRF-M high (94)                   |                                 |
|-----------------|--------------------------------------|---------------------------------|--------------------------------------|---------------------------------|--------------------------------------|---------------------------------|
|                 | Number of samples with amplification | Number of samples with mutation | Number of samples with amplification | Number of samples with mutation | Number of samples with amplification | Number of samples with mutation |
| CKAP2L          | 6                                    |                                 | 0                                    |                                 | 0                                    |                                 |
| CKS2            | 14                                   |                                 | 5                                    |                                 | 0                                    | 1                               |
| DBF4            | 128                                  |                                 | 33                                   |                                 | 6                                    |                                 |
| DDIAS           | 4                                    |                                 | 10                                   |                                 | 5                                    |                                 |
| DDX39A          | 50                                   |                                 | 8                                    |                                 | 2                                    |                                 |
| DEPDC1          | 17                                   |                                 | 4                                    |                                 | 0                                    |                                 |
| DEPDC1B         | 4                                    | 1                               | 0                                    |                                 | 0                                    |                                 |
| DLGAP5          | 2                                    | 1                               | 1                                    |                                 | 0                                    |                                 |
| DNMT1           | 52                                   |                                 | 6                                    |                                 | 2                                    | 1                               |
| DSN1            | 44                                   |                                 | 9                                    |                                 | 1                                    |                                 |
| DTL             | 20                                   |                                 | 5                                    |                                 | 1                                    |                                 |
| DTYMK           | 7                                    | 1                               | 1                                    |                                 | 1                                    |                                 |
| E2F7            | 10                                   | 1                               | 2                                    |                                 | 0                                    |                                 |
| ECT2            | 12                                   |                                 | 4                                    | 1                               | 2                                    |                                 |
| EME1            | 6                                    |                                 | 4                                    |                                 | 0                                    |                                 |
| ESPL1           | 14                                   | 2                               | 2                                    |                                 | 0                                    | 1                               |
| FAM64A          | 1                                    | 1                               | 1                                    |                                 | 0                                    | 1                               |
| FANCD2          | 12                                   | 1                               | 6                                    |                                 | 1                                    |                                 |
| FANCI           | 4                                    | 1                               | 3                                    |                                 | 1                                    |                                 |
| FBXO5           | 3                                    |                                 | 1                                    |                                 | 0                                    |                                 |
| FOXM1           | 17                                   | 1                               | 18                                   |                                 | 5                                    | 1                               |
| GAS2L3          | 9                                    |                                 | 3                                    |                                 | 0                                    |                                 |
| GIN51           | 42                                   |                                 | 9                                    |                                 | 2                                    |                                 |
| GIN52           | 2                                    |                                 | 1                                    |                                 | 0                                    |                                 |
| GJC1            | 6                                    |                                 | 1                                    |                                 | 0                                    |                                 |
| GPX7            | 16                                   |                                 | 4                                    |                                 | 0                                    |                                 |
| GTF2IRD2        | 127                                  |                                 | 27                                   |                                 | 3                                    |                                 |
| GTSE1           | 3                                    | 2                               | 2                                    |                                 | 0                                    |                                 |
| HJURP           | 5                                    |                                 | 0                                    | 1                               | 0                                    |                                 |
| HMGB2           | 2                                    |                                 | 0                                    |                                 | 0                                    |                                 |
| HMMR            | 6                                    |                                 | 0                                    |                                 | 0                                    |                                 |
| IGF2BP3         | 120                                  |                                 | 24                                   |                                 | 4                                    |                                 |
| KIAA0101        | 3                                    |                                 | 1                                    |                                 | 1                                    |                                 |
| KIF11           | 0                                    |                                 | 0                                    |                                 | 0                                    |                                 |
| KIF14           | 19                                   |                                 | 5                                    |                                 | 2                                    |                                 |
| KIF15           | 8                                    | 2                               | 3                                    |                                 | 0                                    |                                 |
| KIF20A          | 6                                    | 1                               | 0                                    | 1                               | 0                                    |                                 |
| KIF23           | 3                                    |                                 | 1                                    |                                 | 1                                    | 1                               |



**Table S11 continued.**

| CDC20-M members | CDC20-M high or intermediate (170)   |                                 | CREBRF-M intermediate (111)          |                                 | CREBRF-M high (94)                   |                                 |
|-----------------|--------------------------------------|---------------------------------|--------------------------------------|---------------------------------|--------------------------------------|---------------------------------|
|                 | Number of samples with amplification | Number of samples with mutation | Number of samples with amplification | Number of samples with mutation | Number of samples with amplification | Number of samples with mutation |
| KIF2C           | 15                                   |                                 | 4                                    |                                 | 0                                    |                                 |
| KIF4A           | 0                                    | 1                               | 0                                    |                                 | 0                                    |                                 |
| KIFC1           | 2                                    |                                 | 2                                    |                                 | 0                                    |                                 |
| KNTC1           | 11                                   |                                 | 7                                    |                                 | 0                                    |                                 |
| KPNA2           | 8                                    |                                 | 4                                    |                                 | 0                                    |                                 |
| LMNB1           | 6                                    |                                 | 1                                    |                                 | 0                                    |                                 |
| LMNB2           | 53                                   |                                 | 9                                    | 1                               | 2                                    |                                 |
| LRR1            | 2                                    |                                 | 1                                    |                                 | 0                                    |                                 |
| MAD2L1          | 1                                    |                                 | 0                                    |                                 | 0                                    |                                 |
| MCM2            | 9                                    | 1                               | 1                                    |                                 | 0                                    |                                 |
| MCM3            | 0                                    | 1                               | 2                                    |                                 | 0                                    |                                 |
| MCM6            | 7                                    |                                 | 0                                    |                                 | 0                                    | 1                               |
| MCM8            | 45                                   |                                 | 9                                    |                                 | 2                                    |                                 |
| MELK            | 12                                   | 1                               | 2                                    |                                 | 2                                    |                                 |
| MKI67           | 0                                    | 3                               | 0                                    | 1                               | 0                                    | 1                               |
| MND1            | 2                                    | 1                               | 0                                    |                                 | 0                                    |                                 |
| MYBL2           | 43                                   |                                 | 8                                    |                                 | 2                                    |                                 |
| NCAPG           | 2                                    |                                 | 1                                    |                                 | 0                                    |                                 |
| NCAPG2          | 125                                  |                                 | 36                                   |                                 | 11                                   |                                 |
| NCAPH           | 7                                    |                                 | 0                                    |                                 | 0                                    |                                 |
| NDC1            | 16                                   | 1                               | 4                                    |                                 | 0                                    |                                 |
| NDC80           | 9                                    |                                 | 2                                    |                                 | 3                                    |                                 |
| NEK2            | 20                                   |                                 | 5                                    |                                 | 1                                    |                                 |
| NRM             | 0                                    |                                 | 4                                    |                                 | 0                                    |                                 |
| NUF2            | 20                                   |                                 | 8                                    |                                 | 1                                    |                                 |
| NUSAP1          | 3                                    |                                 | 1                                    |                                 | 1                                    |                                 |
| PARPBP          | 9                                    |                                 | 3                                    |                                 | 0                                    |                                 |
| PBK             | 8                                    |                                 | 11                                   |                                 | 1                                    |                                 |
| PCNA            | 45                                   |                                 | 8                                    |                                 | 2                                    |                                 |
| PDIA4           | 124                                  |                                 | 38                                   |                                 | 12                                   |                                 |
| POC1A           | 10                                   |                                 | 3                                    | 1                               | 0                                    |                                 |
| POLE2           | 2                                    | 1                               | 1                                    |                                 | 0                                    |                                 |
| PRC1            | 5                                    |                                 | 3                                    |                                 | 1                                    |                                 |
| PTBP1           | 54                                   |                                 | 14                                   |                                 | 3                                    |                                 |
| PTTG1           | 6                                    |                                 | 0                                    |                                 | 1                                    |                                 |
| RACGAP1         | 14                                   |                                 | 3                                    |                                 | 0                                    |                                 |
| RAE1            | 45                                   |                                 | 10                                   |                                 | 2                                    |                                 |
| RBBP8           | 10                                   |                                 | 0                                    |                                 | 1                                    | 1                               |

**Table S11 continued.**

| CDC20-M members | CDC20-M high or intermediate (170)   |                                 | CREBRF-M intermediate (111)          |                                 | CREBRF-M high (94)                   |                                 |
|-----------------|--------------------------------------|---------------------------------|--------------------------------------|---------------------------------|--------------------------------------|---------------------------------|
|                 | Number of samples with amplification | Number of samples with mutation | Number of samples with amplification | Number of samples with mutation | Number of samples with amplification | Number of samples with mutation |
| RFC2            | 129                                  |                                 | 26                                   |                                 | 3                                    |                                 |
| RFC3            | 4                                    |                                 | 1                                    |                                 | 1                                    |                                 |
| RFC4            | 16                                   | 1                               | 3                                    |                                 | 1                                    |                                 |
| RNASEH2A        | 49                                   | 1                               | 7                                    |                                 | 2                                    |                                 |
| RRM2            | 7                                    |                                 | 2                                    |                                 | 0                                    |                                 |
| SGO2            | 6                                    | 3                               | 1                                    |                                 | 0                                    |                                 |
| SHCBP1          | 7                                    |                                 | 2                                    |                                 | 1                                    |                                 |
| SMC4            | 10                                   |                                 | 2                                    | 1                               | 0                                    | 1                               |
| SNRPB           | 44                                   | 1                               | 10                                   |                                 | 2                                    |                                 |
| SPAG5           | 4                                    | 3                               | 1                                    |                                 | 0                                    |                                 |
| SPC24           | 53                                   |                                 | 7                                    |                                 | 2                                    |                                 |
| STIL            | 16                                   | 1                               | 4                                    |                                 | 0                                    |                                 |
| TACC3           | 10                                   |                                 | 2                                    |                                 | 1                                    |                                 |
| TCF3            | 52                                   | 1                               | 9                                    |                                 | 2                                    |                                 |
| TIMELESS        | 15                                   | 1                               | 3                                    | 2                               | 0                                    |                                 |
| TK2             | 2                                    |                                 | 1                                    |                                 | 0                                    |                                 |
| TOP2A           | 5                                    | 1                               | 1                                    |                                 | 0                                    |                                 |
| TPX2            | 45                                   | 1                               | 9                                    |                                 | 1                                    | 1                               |
| TRIP13          | 6                                    |                                 | 2                                    | 1                               | 1                                    |                                 |
| TTK             | 1                                    | 1                               | 0                                    |                                 | 0                                    |                                 |
| TYMS            | 10                                   |                                 | 4                                    |                                 | 3                                    |                                 |
| UBE2C           | 45                                   |                                 | 9                                    |                                 | 2                                    |                                 |
| UBE2S           | 42                                   |                                 | 3                                    |                                 | 0                                    |                                 |
| USP1            | 17                                   |                                 | 4                                    |                                 | 0                                    |                                 |
| ZNF765          | 40                                   |                                 | 4                                    |                                 | 0                                    |                                 |
| ZNF850          | 46                                   |                                 | 3                                    |                                 | 1                                    |                                 |
| ZWINT           | 0                                    | 1                               | 2                                    |                                 | 0                                    |                                 |

### **Supplementary References**

1. Sun L, *et al.* (2006) Neuronal and glioma-derived stem cell factor induces angiogenesis within the brain. *Cancer cell* 9(4):287-300.
2. Gravendeel LA, *et al.* (2009) Intrinsic gene expression profiles of gliomas are a better predictor of survival than histology. *Cancer research* 69(23):9065-9072.
3. Madhavan S, *et al.* (2009) Rembrandt: helping personalized medicine become a reality through integrative translational research. *Mol Cancer Res* 7(2):157-167.
4. Kang HJ, *et al.* (2011) Spatio-temporal transcriptome of the human brain. *Nature* 478(7370):483-489.
5. Florio M, *et al.* (2015) Human-specific gene ARHGAP11B promotes basal progenitor amplification and neocortex expansion. *Science (New York, N.Y)* 347(6229):1465-1470.
6. Cahoy JD, *et al.* (2008) A transcriptome database for astrocytes, neurons, and oligodendrocytes: a new resource for understanding brain development and function. *J Neurosci* 28(1):264-278.
7. Novershtern N, *et al.* (2011) Densely interconnected transcriptional circuits control cell states in human hematopoiesis. *Cell* 144(2):296-309.
8. de Graaf CA, *et al.* (2016) Haemopedia: An Expression Atlas of Murine Hematopoietic Cells. *Stem Cell Reports* 7(3):571-582.
9. Kim SK, *et al.* (2001) A gene expression map for *Caenorhabditis elegans*. *Science* 293(5537):2087-2092.
10. Janic A, Mendizabal L, Llamazares S, Rossell D, & Gonzalez C (2010) Ectopic expression of germline genes drives malignant brain tumor growth in *Drosophila*. *Science* 330(6012):1824-1827.
11. Bao ZS, *et al.* (2014) RNA-seq of 272 gliomas revealed a novel, recurrent PTPRZ1-MET fusion transcript in secondary glioblastomas. *Genome Res* 24(11):1765-1773.
12. Su G, Morris JH, Demchak B, & Bader GD (2014) Biological network exploration with Cytoscape 3. *Current protocols in bioinformatics* 47:8 13 11-24.
13. Szklarczyk D, *et al.* (2017) The STRING database in 2017: quality-controlled protein-protein association networks, made broadly accessible. *Nucleic acids research* 45(D1):D362-D368.
14. Monti ST, P.; Mesirov, J.; Golub, T. (2003) Consensus Clustering: A Resampling-Based Method for Class Discovery and Visualization of Gene Expression Microarray Data. *Machine Learning* 52:91-118.
15. Mermel CH, *et al.* (2011) GISTIC2.0 facilitates sensitive and confident localization of the targets of focal somatic copy-number alteration in human cancers. *Genome Biol* 12(4).
16. Cibulskis K, *et al.* (2013) Sensitive detection of somatic point mutations in impure and heterogeneous cancer samples. *Nature biotechnology* 31(3):213-219.
17. Mcgill R, Tukey JW, & Larsen WA (1978) Variations of Box Plots. *Am Stat* 32(1):12-16.

18. Frigge M, Hoaglin DC, & Iglewicz B (1989) Some Implementations of the Boxplot. *Am Stat* 43(1):50-54.
19. Subramanian A, *et al.* (2005) Gene set enrichment analysis: A knowledge-based approach for interpreting genome-wide expression profiles. *Proceedings of the National Academy of Sciences of the United States of America* 102(43):15545-15550.
20. Di Stefano AL, *et al.* (2015) Detection, Characterization, and Inhibition of FGFR-TACC Fusions in IDH Wild-type Glioma. *Clinical Cancer Research* 21(14):3307-3317.
